# Supplementary material
Source: PubMed Central journal article supplement (PMC4746370)

# The *HTT* CAG-Expansion Mutation Determines Age at Death but Not Disease Duration in Huntington Disease

Jae Whan Keum,<sup>1</sup> Aram Shin,<sup>1</sup> Tammy Gillis,<sup>1</sup> Jayalakshmi Srinidhi Mysore,<sup>1</sup> Kawther Abu Elneel,<sup>1</sup> Diane Lucente,<sup>1</sup> Tiffany Hadzi,<sup>2</sup> Peter Holmans,<sup>3,9</sup> Lesley Jones,<sup>3,9</sup> Michael Orth,<sup>4,9</sup> Seung Kwak,<sup>5,9</sup> Marcy E. MacDonald,<sup>1,6,7,9</sup> James F. Gusella,<sup>1,7,8,9</sup> and Jong-Min Lee<sup>1,6,7,9,\*</sup>

Huntington disease (HD) is caused by an expanded *HTT* CAG repeat that leads in a length-dependent, completely dominant manner to onset of a characteristic movement disorder. HD also displays early mortality, so we tested whether the expanded CAG repeat exerts a dominant influence on age at death and on the duration of clinical disease. We found that, as with clinical onset, HD age at death is determined by expanded CAG-repeat length and has no contribution from the normal CAG allele. Surprisingly, disease duration is independent of the mutation's length. It is also unaffected by a strong genetic modifier of HD motor onset. These findings suggest two parsimonious alternatives. (1) HD pathogenesis is driven by mutant huntingtin, but before or near motor onset, sufficient CAG-driven damage occurs to permit CAG-independent processes and then lead to eventual death. In this scenario, some pathological changes and their clinical correlates could still worsen in a CAG-driven manner after disease onset, but these CAG-related progressive changes do not themselves determine duration. Alternatively, (2) HD pathogenesis is driven by mutant huntingtin acting in a CAG-dependent manner with different time courses in multiple cell types, and the cellular targets that lead to motor onset and death are different and independent. In this scenario, processes driven by *HTT* CAG length lead directly to death but not via the striatal pathology associated with motor manifestations. Each scenario has important ramifications for the design and testing of potential therapeutics, especially those aimed at preventing or delaying characteristic motor manifestations.

## Introduction

Huntington disease (HD [OMIM: 143100]) is a dominantly inherited disorder<sup>1,2</sup> whose characteristic neurological symptoms result from an expanded CAG repeat of greater than 35 units in the huntingtin-encoding sequence of *HTT* (OMIM: 613004).<sup>2–5</sup> It has long been known that the age of onset of HD motor symptoms is negatively correlated with the length of the expanded *HTT* CAG repeat,<sup>2,6–9</sup> but the question of whether the length of the normal CAG allele also plays a role in determining onset remained uncertain until recently. Two publications reported that a complex interaction between the CAG-repeat lengths of the normal and expanded alleles played a significant role in determining an individual's age at motor onset.<sup>10,11</sup> However, a more comprehensive study recently uncovered issues with the statistical analysis of the correlation between age at onset and the CAG repeat, developed a route to robust statistical analysis of such data, and concluded that the length of the normal CAG allele has no significant impact, either alone or in interaction with the expanded CAG repeat, on age at motor onset.<sup>12</sup> Consistent with this conclusion, age at motor onset of HD subjects with two expanded *HTT* alleles is determined by the longer of their two CAG repeats and is similar to that of subjects with a single mutant allele of comparable size.<sup>12</sup> Thus,

the expanded *HTT* CAG repeat triggers HD pathogenesis (defined here as the underlying abnormal process that leads to pathology, defined in turn as disease phenotype), and the length of the mutation largely determines the rate of the pathogenic process that leads to clinical motor signs in a fully dominant fashion. The motor disturbances are thought to result from dysfunction and degeneration of neurons in the striatum, which, according to post-mortem pathological examination of brains, is also correlated with CAG-repeat length.<sup>13–16</sup> The relationship among CAG-repeat length, age at motor onset, and inferred rate of striatal pathology has informed the potential for treatment by *HTT* silencing, given that the lack of an effect of either the normal allele or an interaction between normal and expanded alleles implies that one can target the single mutant copy of *HTT* in the striatum to delay onset and worsening of motor symptoms.

Another important HD feature that has been reported to show a strong correlation with expanded CAG-repeat length is age at death.<sup>6,9,17</sup> Compared to the general population, HD subjects show early mortality,<sup>18</sup> but it is not clear whether this reflects a direct or an indirect effect of mutant huntingtin on vital processes. In principle, early mortality in HD could be due to neurodegenerative changes in the regions most associated with HD clinical symptoms or, alternatively, to some other independent

<sup>1</sup>Center for Human Genetic Research, Massachusetts General Hospital, Boston, MA 02114, USA; <sup>2</sup>GNS Healthcare Inc., One Charles Park, Cambridge, MA 02142, USA; <sup>3</sup>Medical Research Council Centre for Neuropsychiatric Genetics and Genomics, Department of Psychological Medicine and Neurology, School of Medicine, Cardiff University, Cardiff CF24 4HQ, UK; <sup>4</sup>Department of Neurology, University of Ulm, Ulm 089081, Germany; <sup>5</sup>CHDI Foundation, Princeton, NJ 08540, USA; <sup>6</sup>Department of Neurology, Harvard Medical School, Boston, MA 02115, USA; <sup>7</sup>Medical and Population Genetics Program, Broad Institute of MIT and Harvard, Cambridge, MA 02142, USA; <sup>8</sup>Department of Genetics, Harvard Medical School, Boston, MA 02115, USA; <sup>9</sup>Genetic Modifiers of Huntington's Disease Consortium

\*Correspondence: [jlee51@mgh.harvard.edu](mailto:jlee51@mgh.harvard.edu)

<http://dx.doi.org/10.1016/j.ajhg.2015.12.018>. ©2016 by The American Society of Human Genetics. All rights reserved.

**Table 1. Summary of Statistical Models for Testing Effects of CAG-Repeat Sizes on Age at Death in HD**

|         | Sample Size | Estimate (p Value)  |                      |                      | Adjusted R <sup>2</sup> |
|---------|-------------|---------------------|----------------------|----------------------|-------------------------|
|         |             | Expanded CAG        | Normal CAG           | Gender (Male)        |                         |
| Model 1 | 1,019       | -0.056722 (<2E-16)  | -0.001636 (0.134840) | -0.026275 (0.000288) | 66.9%                   |
| Model 2 | 1,019       | -0.056723 (<2E-16)  | not tested           | -0.026240 (0.000296) | 66.9%                   |
| Model 3 | 1,165       | -0.0363498 (<2E-16) | -0.00259 (0.06007)   | -0.0288 (0.00157)    | 74.8%                   |

Two different statistical models were constructed to test the impact of CAG repeats on age at death of HD subjects by using QC-passed data points. Natural-log-transformed age at death was modeled as a function of expanded CAG, normal CAG, and gender with the use of QC-passed data points (model 1). After the normal CAG was confirmed to have no effect on age at death, model 2 was constructed with only the expanded CAG repeat and gender. Finally, for evaluating the impact of samples excluded in models 1 and 2, model 3 was fitted to data including all HD subjects with age-at-death data. Interaction between expanded and normal CAG repeats was not significant and was therefore excluded from modeling.

effect of mutant huntingtin.<sup>16,19–25</sup> In order to inform potential treatments for preventing or delaying disease onset and early death of HD subjects, we performed a comprehensive statistical assessment of the impact of the expanded and normal CAG repeats on determining the timing of death and the relationship between this timing and the prior onset of diagnostic motor signs, an interval that we define as “disease duration.” Our findings suggest that the expanded CAG repeat has a dominant effect on age at death, as it does on age at motor onset, and that the normal CAG allele has no impact. However, they also indicate a surprising lack of contribution of either the mutant or the normal *HTT* allele to the duration of clinical disease from onset to death. We propose two alternative explanations for the relationship between motor onset and death and show that they have quite different implications for designing therapies in HD.

## Material and Methods

### Study Subjects

We analyzed DNA samples from 4,448 HD heterozygous subjects with either a known age at onset of motor signs and/or age at death: 4,161 subjects had age-at-onset data, 1,165 subjects had age-at-death data, and 878 subjects had both. Subjects with a recorded age at death were primarily identified from HD brain banks: the Harvard Brain Tissue Resource Center (McLean Hospital, Belmont), the New York Brain Bank (Columbia University, New York City), the National Neurological Research Specimen Bank (Department of Veterans Affairs Medical Center, Los Angeles), and the Harvard NeuroDiscovery Center Advanced Tissue Resources Core (Massachusetts General Hospital, Charlestown). HD subjects with a recorded age at onset were described previously.<sup>12</sup> The lengths of *HTT* CAG repeats for each DNA sample were determined by a PCR assay against sequenced-allele size standards as described previously.<sup>26</sup> Primary analysis was based on HD subjects who carried one expanded *HTT* CAG repeat (CAG > 35). The means of expanded and normal CAG-repeat lengths of our study subjects were 45.1 (range = 36–120; median = 44) and 18.45 (range = 9–35; median = 18), respectively. Age at death, age at onset of motor signs, and disease duration (the difference between age at onset and age at death) were the primary dependent variables in the statistical models. Ages at onset were estimated by a clinician rater, reported by a family member, and/or self-reported. When multiple ages at onset were available, priority

was given first to the expert rater’s estimate and then to the family member’s report. In addition to analyzing ascertained subjects for onset and/or death, we also independently analyzed observational cohort data from the European Huntington’s Disease Network (EHDN) Registry to construct survival models. CAG repeats of EHDN samples were determined by the same method as above. The familial relationships of our samples were not known because our de-identified data lacked pedigree information. Because related individuals tend to cause statistical inflation, the lack of significant influence in our results would not change dramatically if familial relationships could be included in the model. The study was approved by the Partners HealthCare institutional review board.

### Statistical Analysis of Age at Death

We previously described a robust statistical-analysis method for age at onset of motor signs<sup>12</sup> and used it in this study for the analysis of age at death. Natural-log-transformed age-at-death data from 1,165 subjects were modeled as a function of (1) expanded CAG length, (2) normal CAG length, and (3) gender (Table 1, model 3). In addition, we performed quality-control (QC) analyses to identify a subset of data that met the requirements of linear-regression modeling, including (1) normality, (2) equal variance, and (3) absence of disproportionately influential observations. First, we evaluated data normality for each CAG-repeat length and found that the distribution of age at death approximated a normal distribution for subjects with 40–52 CAG repeats, representing 90.3% of the samples (Figure S1). Variance in age at death was not constant but rather was larger for subjects with smaller expanded CAG repeats, potentially implicating a greater role for modifiers in this range (Figure S2A). We addressed the non-constant variance by log transformation of the data (as shown in Figure S2B), which also rendered the relationship between expanded CAG-repeat length and age at death close to linear (Figure S2C). Lastly, we identified which outliers to exclude by using a standard interquartile-outlier-identification method (Figure S2C). In brief, for each CAG-repeat size, we sorted age-at-death data to obtain an interquartile value (i.e., the difference between the 75<sup>th</sup> and 25<sup>th</sup> percentile data points). Then, 1.5× the interquartile value was added to the 75<sup>th</sup> percentile data point and subtracted from the 25<sup>th</sup> percentile data point. Any age-at-death values outside of this range were identified as potential outliers. These procedures resulted in a subset of 1,019 subjects (87.5% of all those with age-at-death data) for a robust analysis of models that included gender along with both expanded and normal CAG length (model 1) and only expanded CAG length (model 2), as summarized in Table 1. In addition, to evaluate the effect of

outlier removal, we fitted model 3 to all data without excluding any samples. We evaluated the model behavior by checking (1) residuals versus fitted values, (2) quantile-quantile plots, and (3) residuals versus leverage (Figure S3).

We also performed three additional tests to establish the robustness of the conclusion from Table 1. (1) Using the minimal adequate model based on only QC-passed data (Table 1, model 2), we calculated the residual of age at death for all subjects, including outlier subjects, with 40–52 CAGs (total of 1,052 subjects) and subsequently used it as a dependent variable to test the effect of outliers previously excluded via our QC pipeline (Figure S4). (2) We compared the distributions of normal CAG length between HD subjects who represent the top and bottom 10% of residual age-at-death values (105 individuals each; Figure S5). (3) To determine the effects of samples excluded from the model because of repeats longer than 52 CAGs, we constructed an independent model by using only the 97 HD subjects excluded from the analysis (Figure S6). None of these additional tests supported any effect of the normal CAG-repeat length on age at death.

### Statistical Analysis of Disease Duration

Eight hundred and seventy-eight HD subjects were fully ascertained for both age at motor onset and age at death. For each subject, we calculated disease duration by subtracting age at onset from age at death. For these fully ascertained subjects, the range, mean, SD, and median of duration values were 0–46, 15.4, 6.8, and 15 years, respectively. Approximately 72.9% of the HD subjects had duration values within 1 SD of the mean (8.6–22.2 years), forming a non-normal distribution with a sharp peak and long tails, indicating positive excess kurtosis and prompting our non-parametric statistical analysis. Because duration values of 10–20 years were highly enriched in the data regardless of the length of expanded CAG repeats, QC analyses that were applied to age-at-death data and age-at-onset data could not identify a subset of data points that were normally distributed (Figures S7 and S8). Therefore, instead of using parametric regression models, we performed non-parametric modeling (i.e., generalized additive model and Spearman's rank-correlation analysis) to test the significance of CAG-repeat lengths and gender on duration. In addition, we compared disease duration of HD subjects with expanded CAG < 43 to that of HD subjects with expanded CAG > 45 to test whether HD subjects with longer expanded CAG repeats display a shorter duration than do HD subjects with shorter expanded CAG repeats. In a conceptually similar manner, we compared expanded CAG-repeat lengths of HD subjects with the top 10% duration values to those of HD subjects with the bottom 10% of duration values to test whether extreme-duration subjects vary by expanded CAG-repeat length. Finally, we compared disease duration of adult-onset HD subjects (age at onset > 20 years) to that of juvenile-onset HD subjects (age at onset < 21 years) (Mann-Whitney U test).

### Survival Analysis of Duration for an Observational Study Cohort and for Fully Ascertained Samples

In addition to non-parametric duration analyses using HD subjects fully ascertained for both onset and death, survival analysis was performed with data from the EHDN Registry observational cohort. In this dataset, 1,314 HD subjects had only a recorded age at onset, and 115 HD subjects had data on both age at onset and age at death. We performed a non-parametric survival analysis using a Cox Proportional Hazards model by setting age at onset as

time 0 and duration as time to event. For subjects without a recorded age at death, age at onset subtracted from age at last study visit was used as time to event with a censoring indicator. Duration values were modeled as a function of CAG (continuous variable) and gender with the “coxph” function in the “survival” R package. A similar survival analysis approach (but without censoring) using CAG-repeat size as a continuous predictor variable and gender was applied to the data for 855 fully ascertained HD subjects used for our primary non-parametric analysis. In addition, on the basis of sorted CAG-repeat sizes of fully ascertained samples, two groups of HD subjects with the top or bottom 10% of extreme CAG repeats (85 subjects in each group: 50–63 CAGs or 38–41 CAGs, respectively) were identified to be compared for duration through survival analysis.

### Simulation Analysis

The capacity for CAG length to explain duration was not significant in the observed dataset (Figure 3). To estimate whether different levels of explanatory power of the CAG repeat for duration could have been visualized in such data, we first randomly permuted the duration values of the 855 HD subjects. Then, without data replacement, we sampled duration values randomly until the model's  $R^2$  value (model: duration ~ CAG) reached 20%, 10%, 5%, 2%, or 1%. Once the model based on permuted data generated the pre-specified  $R^2$  value, the mean duration for each CAG length based on that simulation set was recorded for plotting against CAG.

### Software Package for Statistical Analysis

All statistical analyses were performed with R (version 3.0.2).

## Results

### Age at Death in HD Is Strongly Correlated with the Length of the Expanded *HTT* CAG Repeat

We initially compared the relationships between (1) expanded CAG-repeat length and age at onset of motor signs, (2) expanded CAG-repeat length and age at death, and (3) age at onset and age at death. Consistent with previous findings,<sup>6,9,12</sup> analysis using all data points showed that age at motor onset (Figure 1A) and age at death (Figure 1B) were both inversely correlated with expanded CAG-repeat length (adjusted  $R^2 = 65.4\%$  and  $74.5\%$ , respectively). However, a substantial amount of variance in age at onset and age at death was not explained by the expanded CAG repeat, suggesting that these outcomes are modified by other factors. In addition, age at death was strongly correlated with age at onset (Figure 1C), indicating that the former can be predicted relatively accurately from the latter (adjusted  $R^2 = 77.5\%$ ). Interestingly, the correlation between expanded CAG length and age at death appeared stronger, given that age at onset is more variable. This could be because age at onset involves a subjective assessment on the part of an expert clinician, whereas age at death is objectively recorded. It could also be that age at onset is more easily modified by other genetic or environmental factors than is age at death. In any event, the strong correlation between age at death

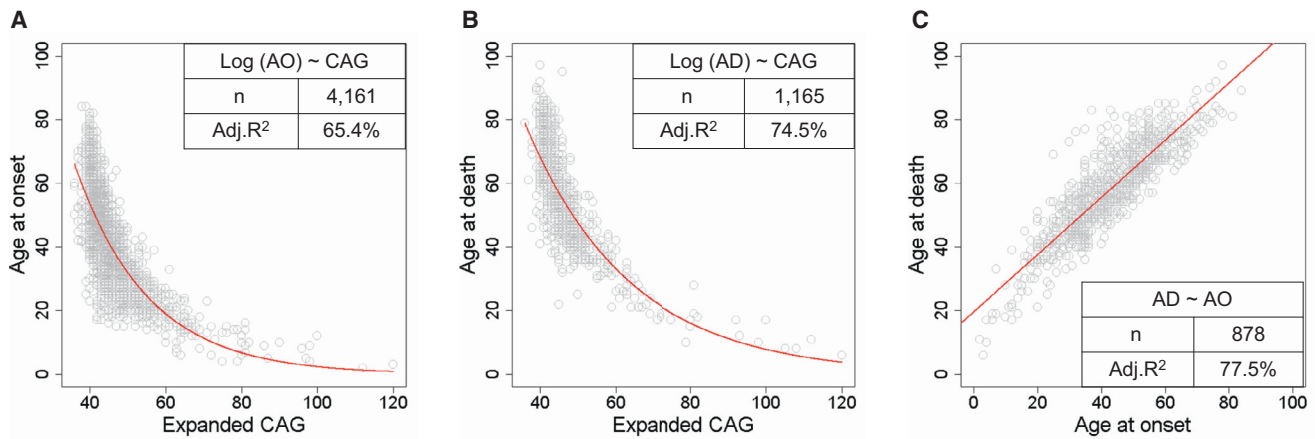

**Figure 1. Correlation between Age at Death and the Length of the Expanded *HTT* CAG Repeat**

(A) Age at onset of motor signs plotted against the expanded CAG-repeat length.

(B) Age at death plotted against the expanded CAG-repeat length.

(C) Age at death plotted against age at onset for individuals for whom both are known.

In each panel, each circle represents a unique HD subject. The red trend line represents a statistical model based on all data points prior to QC analysis and describes the relationship between natural-log-transformed age at onset and expanded CAG-repeat length (A), between natural-log-transformed age at death and expanded CAG-repeat length (B), and between age at death and age at onset (C). A summary of a model, including its formula, sample number (n), and adjusted R<sup>2</sup> (Adj. R<sup>2</sup>) value is provided inside each plot. The larger variance in age at onset (A) than in age at death (B) is not due to statistical artifacts related to sample size, given that the R<sup>2</sup> values for age-at-onset models based on randomly picked 1,165 subject sample sets (mean = 0.6537) were similar to those of the original model using all data points.

and expanded CAG length indicates that, averaged across the HD population, the length of the mutation is the primary factor determining at what age an individual with HD dies.

#### Age at Death Is Not Influenced by the Length of the Normal *HTT* CAG Repeat

Next, we tested whether variance in age at death in HD is influenced by the normal CAG repeat or gender. The expanded CAG repeats in 1,165 HD subjects ranged from 36 to 120 CAGs; the median of the expanded and normal CAG-repeat lengths was 44 and 18, respectively. We have reported previously on the importance of conforming to data-quality assumptions in parametric statistical analysis of CAG-repeat relationships to avoid spurious results when testing for potentially subtle effects of modifiers, and we have proposed a QC pipeline for robust statistical analysis.<sup>12</sup> Among other factors, important requirements that should be confirmed in parametric regression analysis include (1) data normality, (2) equal variance, and (3) absence of disproportionately influential data points. We performed QC analyses, as described in Lee et al.<sup>12</sup> and in the **Material and Methods** (Figures S1 and S2), to generate a dataset that includes 1,019 subjects with 40–52 CAG repeats and conforms to the assumptions of regression analysis (Figure S3). We used this dataset to generate reliable statistical models, model 1 and model 2, which include and exclude the normal CAG repeat, respectively (Table 1). Only the expanded CAG-repeat length and gender explained a significant portion of the variance in age at death (model 1; adjusted R<sup>2</sup> = 66.9%) given that omitting the normal CAG-repeat length from the model (model 2; R<sup>2</sup> = 66.9%) made no significant difference

(ANOVA model comparison, p value = 0.1348). Exclusion of outliers did not change the conclusion given that model 3, fitted to all data without any sample exclusion, also revealed significance only for expanded CAG and gender (Table 1; Figure S3). Similarly, tests involving inclusion of the outliers excluded by the QC pipeline or specific examination of individuals with >52 CAGs failed to reveal any significant impact of the normal CAG-repeat length (Figures S4–S6). Thus, the size of the expanded CAG repeat and gender have predictive power for age at death, but the normal CAG length has no discernible impact.

#### Relationship between Age at Onset and Age at Death: Disease Duration

The construction of statistical models relating the expanded CAG repeat length to both age at onset<sup>12</sup> and age at death (Table 1, model 2) allowed us to estimate indirectly the average time between the initial presentation of diagnostic motor signs and death in male and female HD subjects. Age at onset was not different between the two genders (Figure 2A, dashed lines), but there was a significant ~1 year difference between males and females in age at death (Figure 2A, red and blue solid lines). Interestingly, the age-at-death model (solid) and the age-at-onset model (dashed) were largely parallel for CAG ranges associated with onset in adulthood, indicating that the disease duration from diagnosis to death is similar regardless of expanded CAG-repeat size. This implies that gender-associated disease duration is independent of the length of the expanded CAG repeat, which we have suggested previously from a limited post-mortem brain study.<sup>5,9</sup>

We next used several approaches to test this proposition in the 878 HD subjects for whom disease duration could be

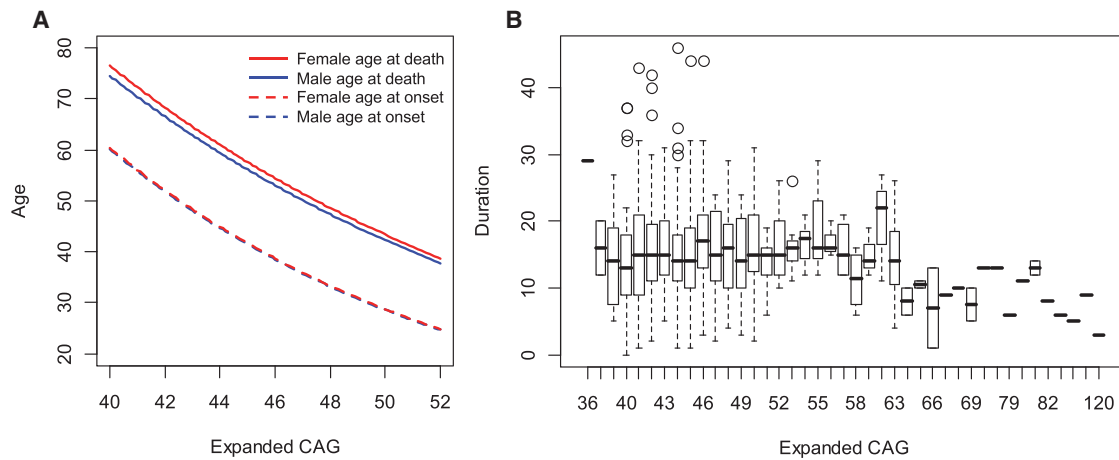

**Figure 2. Distribution of Disease Duration by CAG-Repeat Length**

(A) Models for age at death (Table 1, model 2) and age at onset<sup>12</sup> were constructed with normally distributed samples and a gender covariate. For the age-at-onset model, gender was included in the model described previously.<sup>12</sup> Blue and red lines represent statistical models for males and females, respectively. Solid and dotted lines represent the CAG age-at-death model and the CAG age-at-onset model, respectively.

(B) The distribution of disease duration for each expanded CAG repeat was plotted in a boxplot format. Open circles are outliers defined by a standard interquartile-outlier-identification method. The top, middle, and bottom of the box represent the 75<sup>th</sup> percentile (upper quartile), median, and 25<sup>th</sup> percentile (lower quartile) data points, respectively. The higher and lower whiskers indicate the upper quartile plus 1.5× the interquartile range (IQR) and the lower quartile minus 1.5× the IQR, respectively.

measured directly because both age at motor onset and age at death were ascertained, a much larger dataset than analyzed previously. The median of the expanded and normal alleles was 44 and 18 CAGs, respectively. As suggested from the statistical models, although the duration values were highly variable for any given CAG-repeat length, the median of measured disease duration for these HD subjects appeared similar regardless of expanded CAG-repeat length (Figure 2B). It was not possible to construct a reliable parametric linear-regression model relating disease duration and expanded CAG length because the duration values were not normally distributed; instead, they were highly enriched with values between 10 and 20 years, quite different from the distributions of age at onset<sup>12</sup> and age at death (Figures S7 and S8). Therefore, as a first analysis, we instead performed non-parametric statistical analysis by using a generalized additive model and Spearman's rank correlation, which does not require normal distribution of the data, to test whether disease duration is associated with CAG-repeat length. This generalized additive model based on 855 subjects with those CAG sizes represented by at least three HD subjects indicated that gender was a significant predictor of disease duration in that male HD subjects had a slightly shorter duration than did female HD subjects ( $p$  value = 0.00015). However, there was no significant association or correlation between disease duration and either the expanded or normal CAG-repeat length (Figure 3).

We also specifically examined duration values for HD subjects with shorter or longer expanded CAG repeats. The median CAG repeat in our duration data was 44, so we excluded three consecutive CAGs bins around the median CAG in order to generate two arbitrary groups of HD

subjects with (1) similar sample sizes and (2) distinct CAG-repeat lengths. Disease duration for HD subjects with expanded CAG length < 43 (Figure S9A, blue; 247 subjects) and > 45 (Figure S9A, red; 305 subjects) was not significantly different (Figure S9B; Mann-Whitney U test,  $p$  value = 0.484). Furthermore, mutant alleles in HD subjects representing the top 10% (Figure S9C, red; median duration = 27 years; 87 subjects) and bottom 10% (Figure S9C, blue; median duration = 5 years; 87 subjects) of duration values showed similar expanded CAG-repeat sizes (Figure S9D; Mann-Whitney U test,  $p$  value = 0.8975). Finally, we determined whether duration values differed between juvenile-onset HD subjects (age at onset < 21 years old; 55 subjects) and adult-onset HD subjects (age at onset > 20 years old; 823 subjects). This analysis revealed the expected significant differences in expanded CAG-repeat lengths, age at onset, and age at death but no difference in median disease duration between adult-onset and juvenile-onset HD subjects (Figure 4D; Mann-Whitney U test,  $p$  value = 0.75). In our data, the mean and median duration of those 11 juvenile-onset HD subjects with CAG-repeat size greater than 69 were 9.1 and 9, respectively. Therefore, although disease duration overall in juvenile-onset HD individuals (age at onset < 21 years) is similar to that of adult-onset HD subjects, those with extreme juvenile-onset HD (e.g., age at onset < 10) might have a shorter disease duration.

Consistent with the lack of an effect of the expanded CAG repeat on disease duration in HD heterozygotes, five additional HD individuals with two expanded CAG-repeat alleles had disease duration within 1 SD (8.6–22.2 years) of the mean. Although this is based on a very small cohort of “HD homozygote” individuals (because of their rarity), it

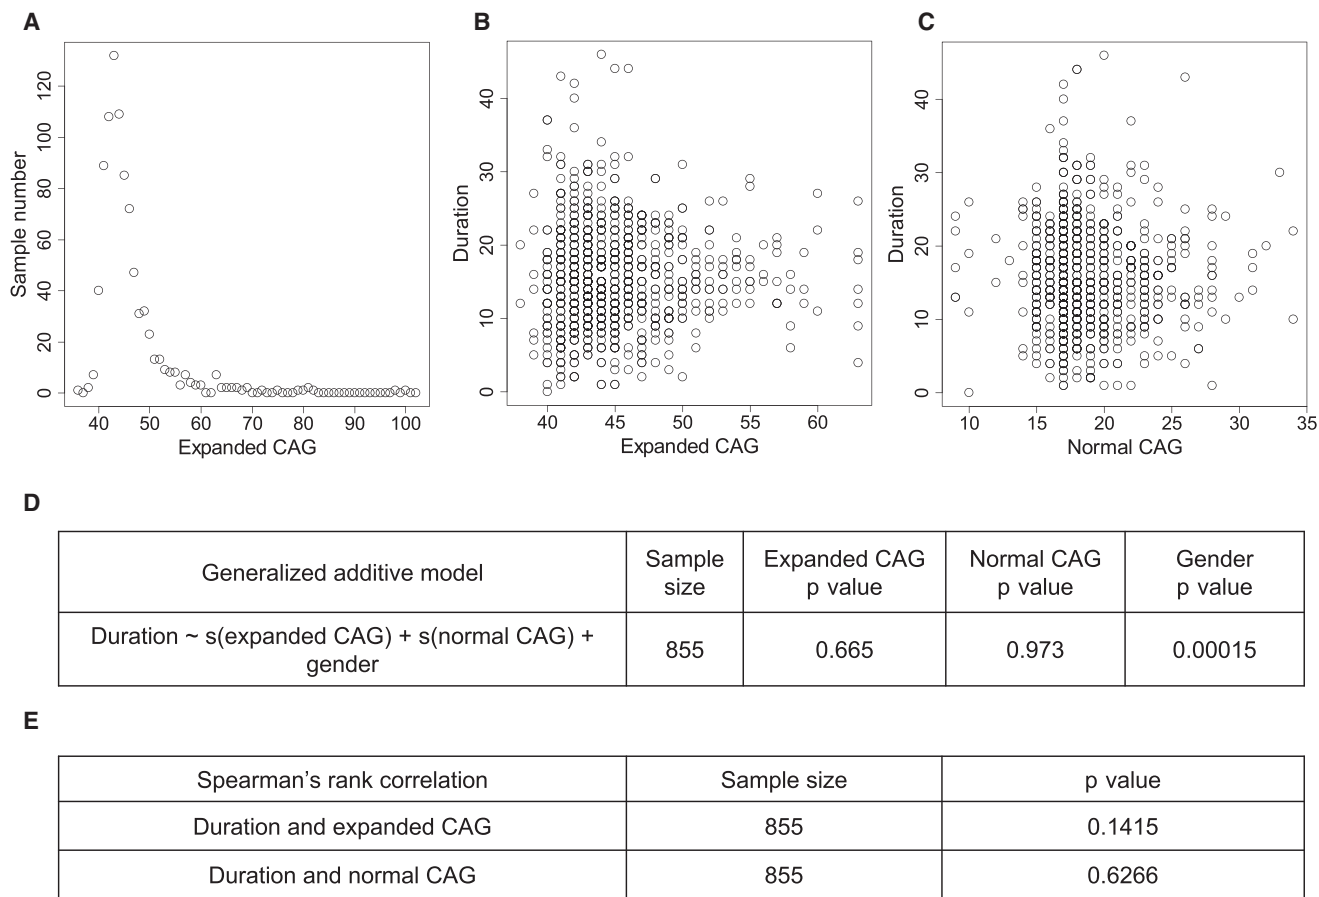

**Figure 3. Non-parametric Analyses to Test Effects of CAG-Repeat Size on Duration**

(A) Sample sizes were plotted against expanded CAG repeats for statistical modeling of duration.

(B and C) Duration values were plotted against either expanded CAG (B) or normal CAG (C).

(D) A generalized linear model (GAM) was constructed to test the effects expanded CAG, normal CAG, and gender on duration in the non-normally distributed data. Expanded CAGs with sample sizes greater than 2 (38–63 CAGs) were used. The p values of independent variables are provided.

(E) In addition, Spearman's rank-correlation analysis was performed for determining whether duration values correlated with the sizes of either expanded or normal CAG repeats.

suggests further the lack of a dosage effect of mutant *HTT* on disease duration.

All of the above comparisons were consistent in supporting the conclusion that in HD, disease duration is independent of the length of the expanded CAG repeat. Because a lack of effect of the disease mutation on the duration of clinical disease is counterintuitive, we were concerned that an actual correlation with CAG length might be obscured by some ascertainment bias. There were two sources of ascertainment for our subjects: (1) cohort studies in which HD subjects were ascertained for age at onset and in which a subset of individuals subsequently died and (2) brain banks where ascertainment was based upon death. Although our ultimate conclusion was derived from individuals from both groups where duration could be measured directly because both parameters were known, it was conceivable that individuals with shorter CAG-repeat lengths and potentially longer duration in observational cohort studies were missed because they have not yet died. Consequently, we performed a survival analysis

for our major source of cohort samples with motor onset: 1,426 heterozygous HD individuals from the EHDN Registry study. Survival analysis based on this observational cohort with censoring indications for surviving HD subjects revealed a significant impact on age at death for expanded CAG (p value < 2E–16), but not normal CAG (p value = 0.0926). Using non-parametric Cox's proportional-hazards analysis, we then tested whether CAG-repeat length and gender influence survival after onset. We found no effect on disease duration for either expanded CAG-repeat length (exponentiated coefficient per one unit of expanded CAG = 1.007; p value = 0.754) or gender (exponentiated coefficient for males = 1.178; p value = 0.385). Tests for proportional-hazards assumption using the “cox.zph” function confirmed that neither CAG-repeat size nor gender violated the assumption; p values for expanded CAG length and gender were 0.504 and 0.680, respectively.

A similar analysis of the 10% extremes of CAG-repeat length from 855 HD subjects from the MA HD Center

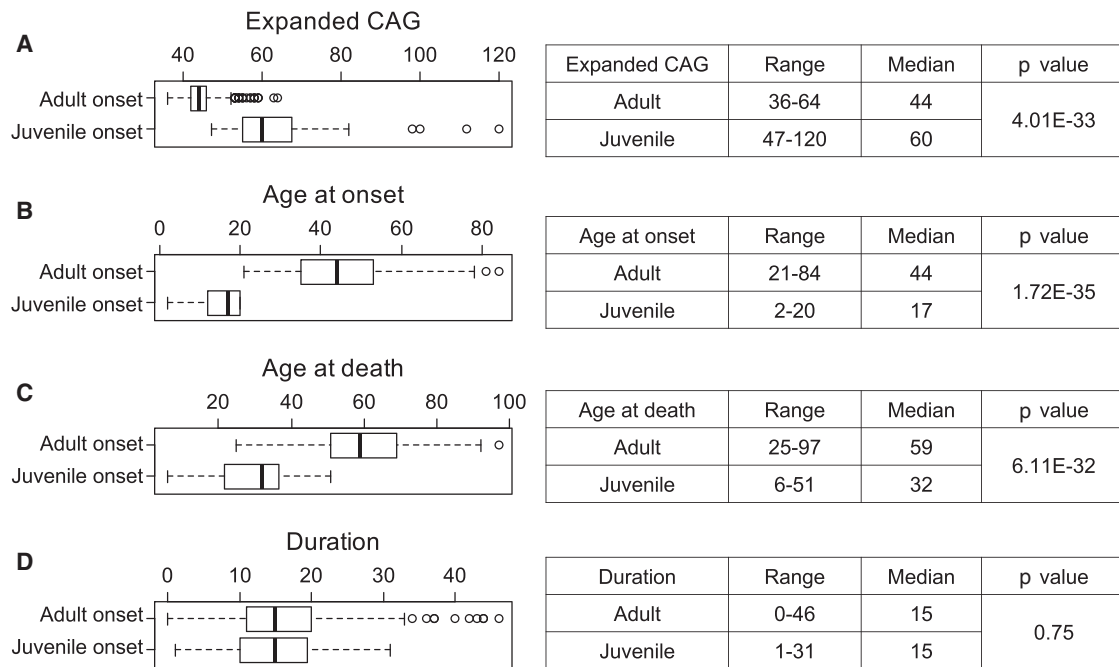

**Figure 4. HD Subjects with Adult Onset and Juvenile Onset Have Similar Durations**

HD subjects with adult age at onset (>20 years; 823 subjects) or juvenile age at onset (<21 years; 55 subjects) were compared for their expanded CAG repeats (A), age at onset (B), age at death (C), and duration (D) with the Mann-Whitney U test. In each panel, a boxplot summarizes the distribution of the test object (left), and a summary-statistics table is provided (right).

Without Walls collection and for whom both age at onset and age at death were known showed an influence only of gender (exponentiated coefficient for low-CAG group = 0.8216,  $p$  value = 0.22; exponentiated coefficient for males = 1.2582,  $p$  value = 0.146). Survival analysis using all 855 ascertained subjects and CAG as a continuous variable also revealed no significant contribution of CAG to duration ( $p$  value = 0.665).

Next, we restricted analysis of duration only to those subjects ascertained through death, i.e., obtained from HD brain banks. Like the full set of 878 individuals with a direct measurement of duration, this set of 524 brain-bank-derived individuals showed no significant correlation between CAG-repeat length and the length of time between onset and death (Spearman's rank correlation,  $p$  value = 0.2738; Pearson's correlation,  $p$  value = 0.4529).

Finally, in order to judge the degree to which we had power to visualize an effect of the expanded CAG-repeat length on duration, we performed simulation studies based upon the characteristics of our actual dataset of 855 individuals of known duration (described in the Figure 3 legend). We simulated distributions of the duration data across the CAG-repeat range on the basis that CAG-repeat length explained 1%, 2%, 5%, 10%, or 20% of the variance in duration (Figure S10). In brief, we used a data matrix of true CAG-repeat size and duration to calculate  $R^2$  to evaluate how much variance in duration was explained by CAG-repeat length in the observed data (Figure S10A). We then randomly shuffled duration values to obtain the explanatory power of permuted CAG on duration.

Although CAG-repeat length accounted for more than 65% of the variance in age at onset and age at death, it had no detectable influence on duration (Figure S10A), whereas these simulations (Figures S10B–S10F) suggest that even a 2% contribution of CAG-repeat length to determining duration could have been detected (Figure S10E).

#### Impact of *HTT* Haplotypes and a Genetic Modifier of Age at Onset on Duration

In the absence of an effect of expanded CAG length on HD duration, we next assessed two additional candidate modifiers. We first tested whether common *HTT* haplotypes, which we have shown do not modify age at onset,<sup>27</sup> might instead have an effect on disease duration. *HTT* haplotypes were defined on the basis of 21 common SNPs that show significant differences in allele frequencies between HD subjects and normal control individuals.<sup>27</sup> ANOVA models in which duration was modeled as a function of *HTT* haplotype, either on the disease chromosome ( $p$  value = 0.363) or on the normal chromosome ( $p$  value = 0.091), provided no evidence of a significant association between duration and *HTT* haplotype.

Recently, through a genome-wide association strategy, we discovered genetic loci significantly associated with the difference between observed age at onset of motor signs and that expected on the basis of the CAG-repeat length of the individual subjects. The genome-wide-significant locus with the largest effect size, detected by SNP rs146353869 on chromosome 15, was estimated to accelerate motor onset by ~6 years, suggesting hastening of

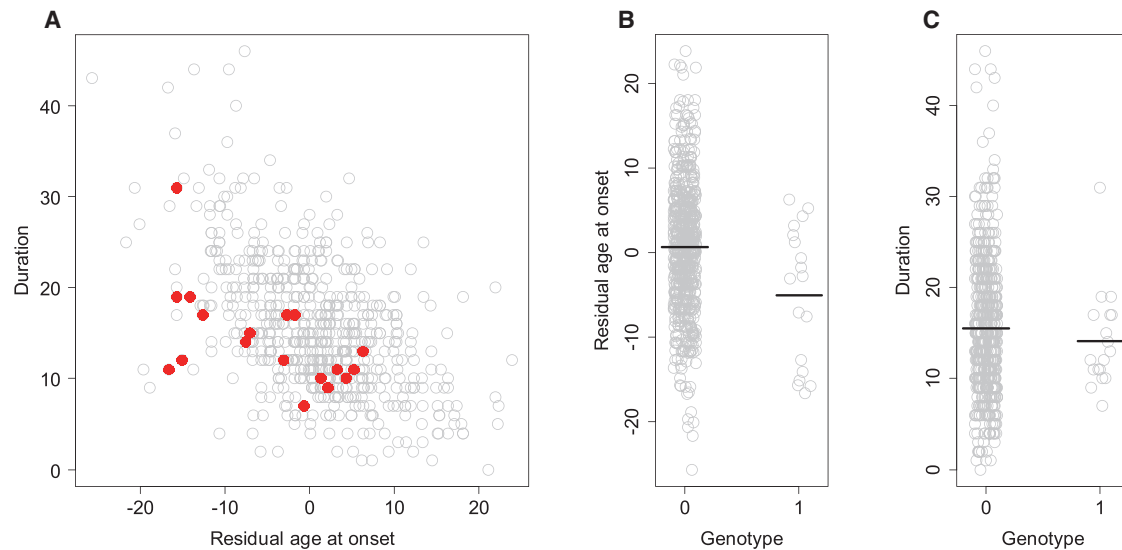

**Figure 5. Duration Is Not Associated with rs146353869**

On the basis of recent results from a genome-wide association (GWA) analysis, we tested whether duration is altered by a strong genetic modifier tagged by SNP rs146353869 on chromosome 15. HD subjects with the minor allele of this SNP developed clinical symptoms significantly (~6 years) earlier than did subjects with a comparable expanded CAG length but without the minor allele of rs146353869. (A) Among samples used in our GWA analysis aimed at identifying age-at-onset modifiers, 654 individuals had both age-at-onset and age-at-death data. Disease duration (i.e., age at death minus age at onset) was plotted against residual age at onset. Gray (636 subjects) and red (18 subjects) circles represent HD subjects without and with a minor allele for rs146353869, respectively. (B and C) Residual age at onset (B) and duration (C) of HD subjects without (genotype 0) or with (genotype 1) a minor allele for rs146353869 are plotted. Black horizontal lines represent the mean. Mann-Whitney U tests were performed to compare residual age at death ( $p$  value = 0.01) and duration ( $p$  value = 0.37) between the two groups of HD subjects differentiated by the rs146353869 genotype.

HD pathogenesis, at least prior to diagnosis. The same SNP was significantly associated with age at death corrected for CAG-repeat length ( $p$  value =  $9.3E-5$ ). We therefore evaluated the potential influence of this strong age-at-onset modifier locus on disease duration.<sup>28</sup> As expected and shown in Figure 5, HD subjects with a minor allele for rs146353869 had onset significantly earlier than those without such an allele (Mann-Whitney U test,  $p$  value = 0.010). However, disease duration was similar between subjects with and without a rs146353869 minor allele (Mann-Whitney U test,  $p$  value = 0.370). Thus, the functional variant tagged by rs146353869 modifies CAG-driven HD pathogenesis but does not influence the length of the CAG-independent period between onset and death.

## Discussion

Our robust statistical analysis based on a large dataset firmly establishes that, like age at diagnostic onset, the age at death of HD individuals is determined primarily by the size of their *HTT* CAG-expansion mutation and is not significantly affected by the normal CAG allele. Indeed, CAG-repeat length is slightly more correlated with age at death than with age at motor onset because of greater variance in the latter, which reflects either the subjectivity of determining onset or its greater susceptibil-

ity to modification. It has been suggested from the effects of precise genetic replicas of the CAG mutation in the endogenous mouse ortholog (formerly *Hdh*, now *Htt*) and the fact that these “knock-in” alleles rescue the embryonic lethality of a null *Htt* allele that mutant huntingtin might precipitate pathogenesis by enhancing or dysregulating some normal activity of huntingtin.<sup>29</sup> At least some normal activities of human huntingtin vary with changes in CAG length even in the normal size range, revealing the CAG repeat to be a polymorphism with functional consequences.<sup>30</sup> Our data with respect to age at motor onset and now age at death indicate that any variations in the activity of normal huntingtin occasioned by changes in the size of the normal allele repeat do not have an effect on the rate of pathogenesis leading to motor onset or death.

Because diagnosis of HD is primarily based upon characteristic motor signs, the length of time that an individual actually displays HD, i.e., the period between motor onset and death, is defined here as disease duration. In the literature, HD disease duration varies greatly (reported ranges of 1–45 years and medians of 16.2–21.4 years), although in some cases, analyses have included individuals ascertained for either onset or death, but not both.<sup>16,31–33</sup> In our analyses, we were able to focus on individuals for whom both age at motor onset and age at death had been ascertained, permitting a direct assignment of disease-duration values. Across this dataset, disease duration (1) is not correlated with the expanded CAG-repeat



length, (2) is similar between HD subjects with low and high CAG expansions, and (3) is comparable between adult-onset and juvenile-onset HD. In addition, expanded CAG lengths are similar between HD subjects with shorter and longer duration. Because our studies were based exclusively on individuals who have already displayed disease onset, it remains formally possible that individuals who have expanded CAG repeats and who are pre-manifest will display a disease duration that is correlated with CAG-repeat length. However, we think that this theoretical possibility is unlikely. The potential bias of studies excluding pre-manifest individuals was first considered in examining the CAG-onset relationship according to a survival model by Langbehn et al.<sup>34</sup> The “Langbehn et al. survival model” for CAG-onset relationship is similar to (1) our regression model based on a large cohort of manifest HD subjects (>4,000) (data not shown) and (2) predictions from previously published formulae for the adult-onset CAG-repeat range.<sup>35</sup> The similarity between the two models when the regression-model dataset is large indicates that the exclusion of pre-manifest individuals does not substantially bias the estimate of the CAG-onset relationship. We would expect the same to be true of the CAG-death relationship and that our duration estimate based on a large sample of subjects fully ascertained for both onset and death is not likely to be substantially biased by the absence of pre-manifest subjects.

Although sometimes assumed, it has not been clearly demonstrated whether the disease duration of juvenile-onset HD subjects (<21 years of age) is generally different from that of adult-onset individuals (>20 years of age). In one study, disease duration was similar across HD subjects for onset in the juvenile and adult age ranges, and the duration was somewhat shorter for those with onset age over 50 years.<sup>32</sup> A second report based on age at onset of first sign and age at death, or on age alone if HD subjects were still living, noted that extremes of onset, either juvenile or elderly, were associated with significantly shorter durations than typical adult onset.<sup>33</sup> Juvenile-onset subjects had a 1- to 2-year-shorter duration (median = 20.0 years) than those with typical adult onset between 20 and 49 years (median of 21.3 years for age at onset between 20 and 34 years; 22.1 years for age at onset between 35 and 49 years).<sup>33</sup> The lack of consistency in disease duration might be due to different definitions and types of onset. However, breaking down the juvenile-onset category into only the most extreme cases of individuals who have the longest CAG repeats and who developed clinical symptoms before 10 years of age has been reported to reveal a significantly shorter disease duration (range = 2–15 years; mean = 6.6 years) than that of other HD subjects.<sup>36,37</sup>

Nevertheless, our data indicate strongly that the duration of the period in which clinical manifestations of HD are expressed, i.e., the period between diagnosis and death, is not altered in the vast majority of HD individuals by the expanded CAG repeat, the normal CAG repeat, *HTT* haplotype, or a strong age-at-onset modifier. Our statistical

confirmation of this seemingly counterintuitive finding argues against the simple scenario in which a toxic CAG-length-determined property of mutant huntingtin drives a single pathogenic process that leads in a sequential manner first to onset and then directly from onset to death. Rather, it suggests two alternative scenarios for the HD disease process, and these should be considered in designing, testing, and interpreting the results of therapeutic interventions, particularly those aimed at silencing the mutant CAG-expanded *HTT* allele.

It is well established that the rate of the pathogenic process that leads to clinical diagnosis is determined primarily by the length of the expanded CAG tract. The onset of diagnostic motor abnormalities is thought to ensue from the dysfunction and eventual loss of striatal neurons, and it has been estimated that at the time of clinical onset, 30% or more of medium spiny neurons in the striatum have been lost, and the remainder have already compromised<sup>38</sup> by a neurodegenerative process that continues as clinical manifestations progressively worsen (commonly referred to as “progression”). Indeed, in studies of post-mortem HD brains, Hadzi et al. have shown that the extent of striatal pathology (pathological grade) is correlated both with CAG-repeat length and with duration.<sup>16</sup> The former correlation is consistent with a CAG-driven pathogenic process causing striatal pathology. The latter correlation makes sense because the longer the duration of disease, the longer that CAG-driven process has to act, and consequently the greater the extent of striatal pathology. However, we have shown the lack of correlation between CAG-repeat length and duration, suggesting that the extent of striatal pathology per se is not a determinant of death and that the reasons for correlation between each of these two parameters and striatal pathology are distinct. In our analyses of the 310 brains for which pathological grade was known, we found, like Hadzi et al.,<sup>16</sup> that higher pathological grade associates with longer CAG repeats, earlier onset, and earlier death, all of which are consistent with a more rapid rate of HD pathogenesis with increasing mutation size. The higher pathological grade also associates with longer duration in these individuals, reinforcing the conclusion that disease duration is not determined by CAG-repeat length or by the extent of striatal pathology.

Like motor onset, age at onset of cognitive and, to a lesser extent, of psychiatric signs is correlated with the expanded CAG length and might reflect contributions of additional neuropathological changes in cortical regions. A simple view of pathogenesis, whereby the same CAG-driven process in the striatum or in these cortical regions leads to diagnostic onset and then simply continues with worsening manifestations and ultimate death, is not a viable hypothesis because of the CAG independence of disease duration. Instead, we propose two alternative parsimonious explanations for these data.

In the first scenario, the pathogenic process is driven by mutant huntingtin, and motor onset results when the coping capacity of the most vulnerable structures,

particularly the striatum, has reached its limit. Around or before motor onset, the damage has so weakened the homeostatic mechanisms of the individual that catastrophic failure of the regions associated with onset enables susceptibility to one or more CAG-independent processes that contribute to causing early death, on average 15 years later. In this “two-stage” scenario, CAG-driven pathological changes, including those affecting other cells and tissues, and consequent worsening of symptoms continue to occur after onset, but these CAG-driven changes are not critical to causing death. Instead, death results from one or more separate CAG-independent processes acting on the background of a critical juncture reached by the initial CAG-dependent pathogenesis. The potential CAG-independent processes that could determine duration are not necessarily limited to intrinsic biological risk factors, given that many external factors (nutrition, medical care, nursing-home care, infectious exposure, etc.) could play a contributory role.

In the second scenario, a pathogenic process is driven by mutant huntingtin independently in multiple cell types in the brain or in other organs, each of which has a distinct coping potential. The striatum is most vulnerable and so succumbs first and produces clinical manifestations that progress over time. However, neither the occurrence of diagnostic symptoms nor their progression due to the underlying CAG-length-dependent pathology determines viability of the individual. Rather, some other cells are critical for viability, and when these essential cells independently reach their coping limit, averaging 15 years after motor onset, the subject dies. In this second scenario, unlike the first, a pathogenic process driven by *HTT* CAG length leads directly to death in a manner that is not a downstream consequence of the pathology associated with characteristic neurological manifestations.

The leading causes of death of HD subjects as reported in the literature are pneumonia and heart disease.<sup>18,39</sup> Although not directly connected to the brain, each of these causes could occur on the background of physiological changes occasioned by the neuronal dysfunction that becomes evident at the time of HD onset (scenario 1) or could be precipitated by direct effects of mutant huntingtin in peripheral cells, such as immune system components or cardiac muscle (scenario 2). Indeed, HD subjects display a number of peripheral abnormalities that could represent either direct or indirect effects of mutant huntingtin, including abnormal energy metabolism, extreme weight loss, diabetes, and reduced pulmonary function.<sup>21,23,24,40–42</sup> These all suggest that although HD is classified as a neurodegenerative disorder, the overall impact of the *HTT* CAG expansion is ultimately rather widespread. Given that HD CAG-driven neuropathological changes in symptom-associated brain regions continue after onset, the early mortality in HD might result from effects of the expanded CAG repeat in vital brain regions not associated with early clinical symptoms (scenario 2), CAG-repeat effects outside the brain (scenario 2), or intrinsic or extrinsic factors unrelated to the CAG repeat (scenario 1).

Our findings and the two distinct explanations proposed for them have implications for developing and testing disease-modifying therapeutic modalities in HD. Our results clearly indicate that only the expanded length of the *HTT* CAG repeat has significant power for predicting both age at onset and age at death but that remaining variance in these measures is unexplained by the CAG mutation and must be due to other causes. One approach that we and others are taking to reveal validated therapeutic targets for HD is to identify genetic modifiers of motor onset in human subjects, i.e., genetic factors that alter the rate of CAG-driven HD pathogenesis and therefore can identify target proteins and processes for the development of traditional small-molecule therapeutics. An example of such a factor is the as yet undefined functional variant tagged by SNP rs146353869, which dramatically hastens motor onset. In both scenarios 1 and 2, drugs based upon modification of CAG-driven processes would be expected to be effective in delaying both onset and death if they are delivered sufficiently prior to onset. In scenario 2, such interventions might also be expected to delay death even if they are delivered after motor onset, whereas in scenario 1 they might alleviate the progression of clinical symptoms without actually delaying death. The CAG independence of disease duration suggests that if the first scenario is correct, an array of modifiers and potential therapeutic targets different from those involved in CAG-dependent processes might be effective in delaying death. Indeed, both alternative scenarios also allow for modifiers that act in a cell- or tissue-specific fashion and have the potential to modify predominantly age at onset or disease duration, but most likely not both.

A fundamentally different route to therapeutic intervention currently being explored is suppression of mutant huntingtin expression through nucleic-acid-based gene-silencing strategies. Planning for initial clinical trials has typically considered delivery of the therapeutic agent to the brains of HD individuals early after clinical diagnosis with the goal of delaying the progression of clinical symptoms and associated neuropathology. In our first scenario, such treatment can be very effective in limiting the progression of clinical symptoms and improving quality of life without necessarily altering disease duration given that the latter is independent of CAG-repeat length. Consequently, although it presents greater regulatory hurdles and difficulties in clinical-trial design, the ideal time to treat with a *HTT*-suppression strategy is significantly prior to diagnostic onset because an effective treatment would then be expected to delay both onset and death. In the second scenario, treatment of the brain might have no impact on preventing death if the gene-silencing strategy is not being delivered to the cells or organ responsible for maintaining viability. Thus, in either scenario, our findings suggest that a brain *HTT*-silencing strategy that is successful in reducing the progression of symptoms might improve the quality of life of HD individuals without necessarily preventing their early death.

Although it is not currently possible to distinguish between our two scenarios for HD pathogenesis leading to early death, the CAG independence of disease duration suggests that the results of treatment trials measuring some aspects of clinical progression after onset might not be predictive for the efficacy of the same treatments in preventing motor onset or early death. Fortunately, ongoing large natural-history studies of HD offer a route for more fully exploring the biological basis of early death in HD in order to distinguish between these explanations and to guide therapeutic development. Most importantly, the application of the continuous CAG analysis strategy, applied here to onset and death, to defining and distinguishing other phenotypic measures (molecular, imaging, neurological, etc.) tied to the pathogenic process offers the hope of enabling clinical trials before motor onset, when disease-modifying treatments based upon CAG-length-dependent effects are expected to be most broadly effective.

### Supplemental Data

Supplemental Data include ten figures and can be found with this article online at <http://dx.doi.org/10.1016/j.ajhg.2015.12.018>.

### Acknowledgments

The authors acknowledge and thank the Harvard Brain Tissue Resource Center at McLean Hospital (Dr. Francine Benes, Director), the New York Brain Bank at Columbia University (Dr. Jean-Paul Vonsattel, Director), the National Neurological Research Specimen Bank at the Department of Veterans Affairs Medical Center (Dr. Wallace Tourtellotte, Director), the Neuropathology Core of the MA Alzheimer Disease Research Center (Matt Frosch, Director), and the Harvard NeuroDiscovery Center Advanced Tissue Resources Core at Massachusetts General Hospital (Dr. Charles Vanderburg, Director) for providing Huntington disease post-mortem brain tissues. We also thank Dr. Richard H. Myers (Boston University School of Medicine) for helpful comments on this manuscript. This work was supported by NIH grants NINDS NS16367, U01NS082079, and R01NS091161 and the CHDI Foundation, Inc.

Received: October 2, 2015

Accepted: December 21, 2015

Published: February 4, 2016

### Web Resources

The URL for data presented herein is as follows:

OMIM, <http://www.omim.org/>

### References

- Huntington, G. (1872). On chorea. *Med. Surg. Rep.* 26, 320–321.
- The Huntington's Disease Collaborative Research Group (1993). A novel gene containing a trinucleotide repeat that is expanded and unstable on Huntington's disease chromosomes. *Cell* 72, 971–983.
- Cattaneo, E., Zuccato, C., and Tartari, M. (2005). Normal huntingtin function: an alternative approach to Huntington's disease. *Nat. Rev. Neurosci.* 6, 919–930.
- Bates, G.P. (2005). History of genetic disease: the molecular genetics of Huntington disease - a history. *Nat. Rev. Genet.* 6, 766–773.
- Gusella, J., and MacDonald, M. (2002). No post-genetics era in human disease research. *Nat. Rev. Genet.* 3, 72–79.
- Andrew, S.E., Goldberg, Y.P., Kremer, B., Telenius, H., Theilmann, J., Adam, S., Starr, E., Squitieri, F., Lin, B., Kalchman, M.A., et al. (1993). The relationship between trinucleotide (CAG) repeat length and clinical features of Huntington's disease. *Nat. Genet.* 4, 398–403.
- Duyao, M., Ambrose, C., Myers, R., Novelletto, A., Persichetti, F., Frontali, M., Folstein, S., Ross, C., Franz, M., Abbott, M., et al. (1993). Trinucleotide repeat length instability and age of onset in Huntington's disease. *Nat. Genet.* 4, 387–392.
- Snell, R.G., MacMillan, J.C., Cheadle, J.P., Fenton, I., Lazarou, L.P., Davies, P., MacDonald, M.E., Gusella, J.F., Harper, P.S., and Shaw, D.J. (1993). Relationship between trinucleotide repeat expansion and phenotypic variation in Huntington's disease. *Nat. Genet.* 4, 393–397.
- Persichetti, F., Srinidhi, J., Kanaley, L., Ge, P., Myers, R.H., D'Arrigo, K., Barnes, G.T., MacDonald, M.E., Vonsattel, J.P., Gusella, J.F., et al. (1994). Huntington's disease CAG trinucleotide repeats in pathologically confirmed post-mortem brains. *Neurobiol. Dis.* 1, 159–166.
- Aziz, N.A., Jurgens, C.K., Landwehrmeyer, G.B., van Roon-Mom, W.M., van Ommen, G.J., Stijnen, T., and Roos, R.A.; EHDN Registry Study Group (2009). Normal and mutant HTT interact to affect clinical severity and progression in Huntington disease. *Neurology* 73, 1280–1285.
- Djoussé, L., Knowlton, B., Hayden, M., Almqvist, E.W., Brinkman, R., Ross, C., Margolis, R., Rosenblatt, A., Durr, A., Dode, C., et al. (2003). Interaction of normal and expanded CAG repeat sizes influences age at onset of Huntington disease. *Am. J. Med. Genet. A.* 119A, 279–282.
- Lee, J.M., Ramos, E.M., Lee, J.H., Gillis, T., Mysore, J.S., Hayden, M.R., Warby, S.C., Morrison, P., Nance, M., Ross, C.A., et al.; PREDICT-HD study of the Huntington Study Group (HSG); REGISTRY study of the European Huntington's Disease Network; HD-MAPS Study Group; COHORT study of the HSG (2012). CAG repeat expansion in Huntington disease determines age at onset in a fully dominant fashion. *Neurology* 78, 690–695.
- Guo, Z., Rudow, G., Pletnikova, O., Codisoti, K.E., Orr, B.A., Crain, B.J., Duan, W., Margolis, R.L., Rosenblatt, A., Ross, C.A., and Troncoso, J.C. (2012). Striatal neuronal loss correlates with clinical motor impairment in Huntington's disease. *Mov. Disord.* 27, 1379–1386.
- Paulsen, J.S., Nopoulos, P.C., Aylward, E., Ross, C.A., Johnson, H., Magnotta, V.A., Juhl, A., Pierson, R.K., Mills, J., Langbehn, D., and Nance, M.; PREDICT-HD Investigators and Coordinators of the Huntington's Study Group (HSG) (2010). Striatal and white matter predictors of estimated diagnosis for Huntington disease. *Brain Res. Bull.* 82, 201–207.
- Rosas, H.D., Goodman, J., Chen, Y.I., Jenkins, B.G., Kennedy, D.N., Makris, N., Patti, M., Seidman, L.J., Beal, M.F., and Koroshetz, W.J. (2001). Striatal volume loss in HD as measured by MRI and the influence of CAG repeat. *Neurology* 57, 1025–1028.

16. Hadzi, T.C., Hendricks, A.E., Latourelle, J.C., Lunetta, K.L., Cupples, L.A., Gillis, T., Mysore, J.S., Gusella, J.F., MacDonald, M.E., Myers, R.H., and Vonsattel, J.P. (2012). Assessment of cortical and striatal involvement in 523 Huntington disease brains. *Neurology* 79, 1708–1715.
17. Pekmezovic, T., Svetel, M., Maric, J., Dujmovic-Basuroski, I., Dragasevic, N., Keckarevic, M., Romac, S., and Kostic, V.S. (2007). Survival of Huntington's disease patients in Serbia: longer survival in female patients. *Eur. J. Epidemiol.* 22, 523–526.
18. Lanska, D.J., Lavine, L., Lanska, M.J., and Schoenberg, B.S. (1988). Huntington's disease mortality in the United States. *Neurology* 38, 769–772.
19. Morton, A.J. (2013). Circadian and sleep disorder in Huntington's disease. *Exp. Neurol.* 243, 34–44.
20. Petersén, A., and Gabery, S. (2012). Hypothalamic and Limbic System Changes in Huntington's Disease. *J. Huntingtons Dis.* 1, 5–16.
21. Reyes, A., Cruickshank, T., Ziman, M., and Nosaka, K. (2014). Pulmonary function in patients with Huntington's disease. *BMC Pulm. Med.* 14, 89.
22. Andreassen, O.A., Dedeoglu, A., Stanojevic, V., Hughes, D.B., Browne, S.E., Leech, C.A., Ferrante, R.J., Habener, J.F., Beal, M.F., and Thomas, M.K. (2002). Huntington's disease of the endocrine pancreas: insulin deficiency and diabetes mellitus due to impaired insulin gene expression. *Neurobiol. Dis.* 11, 410–424.
23. Hu, Y., Liang, J., and Yu, S. (2014). High prevalence of diabetes mellitus in a five-generation Chinese family with Huntington's disease. *J. Alzheimers Dis.* 40, 863–868.
24. Djoussé, L., Knowlton, B., Cupples, L.A., Marder, K., Shoulson, I., and Myers, R.H. (2002). Weight loss in early stage of Huntington's disease. *Neurology* 59, 1325–1330.
25. Kremer, H.P., and Roos, R.A. (1992). Weight loss in Huntington's disease. *Arch. Neurol.* 49, 349.
26. Perlis, R.H., Smoller, J.W., Mysore, J., Sun, M., Gillis, T., Purcell, S., Rietschel, M., Nöthen, M.M., Witt, S., Maier, W., et al. (2010). Prevalence of incompletely penetrant Huntington's disease alleles among individuals with major depressive disorder. *Am. J. Psychiatry* 167, 574–579.
27. Lee, J.M., Gillis, T., Mysore, J.S., Ramos, E.M., Myers, R.H., Hayden, M.R., Morrison, P.J., Nance, M., Ross, C.A., Margolis, R.L., et al. (2012). Common SNP-based haplotype analysis of the 4p16.3 Huntington disease gene region. *Am. J. Hum. Genet.* 90, 434–444.
28. Genetic Modifiers of Huntington's Disease (GeM-HD) Consortium (2015). Identification of Genetic Factors that Modify Clinical Onset of Huntington's Disease. *Cell* 162, 516–526.
29. White, J.K., Auerbach, W., Duyao, M.P., Vonsattel, J.P., Gusella, J.F., Joyner, A.L., and MacDonald, M.E. (1997). Huntingtin is required for neurogenesis and is not impaired by the Huntington's disease CAG expansion. *Nat. Genet.* 17, 404–410.
30. Seong, I.S., Ivanova, E., Lee, J.M., Choo, Y.S., Fossale, E., Anderson, M., Gusella, J.F., Laramie, J.M., Myers, R.H., Lesort, M., and MacDonald, M.E. (2005). HD CAG repeat implicates a dominant property of huntingtin in mitochondrial energy metabolism. *Hum. Mol. Genet.* 14, 2871–2880.
31. Pridmore, S.A. (1990). Age of death and duration in Huntington's disease in Tasmania. *Med. J. Aust.* 153, 137–139.
32. Roos, R.A., Hermans, J., Vegter-van der Vliet, M., van Ommen, G.J., and Bruyn, G.W. (1993). Duration of illness in Huntington's disease is not related to age at onset. *J. Neurol. Neurosurg. Psychiatry* 56, 98–100.
33. Foroud, T., Gray, J., Ivashina, J., and Conneally, P.M. (1999). Differences in duration of Huntington's disease based on age at onset. *J. Neurol. Neurosurg. Psychiatry* 66, 52–56.
34. Langbehn, D.R., Brinkman, R.R., Falush, D., Paulsen, J.S., and Hayden, M.R.; International Huntington's Disease Collaborative Group (2004). A new model for prediction of the age of onset and penetrance for Huntington's disease based on CAG length. *Clin. Genet.* 65, 267–277.
35. Langbehn, D.R., Hayden, M.R., and Paulsen, J.S.; PREDICT-HD Investigators of the Huntington Study Group (2010). CAG-repeat length and the age of onset in Huntington disease (HD): a review and validation study of statistical approaches. *Am. J. Med. Genet. B. Neuropsychiatr. Genet.* 153B, 397–408.
36. Byers, R.K., and Dodge, J.A. (1967). Huntington's chorea in children. Report of four cases. *Neurology* 17, 587–596.
37. Nahhas, F.A., Garbern, J., Krajewski, K.M., Roa, B.B., and Feldman, G.L. (2005). Juvenile onset Huntington disease resulting from a very large maternal expansion. *Am. J. Med. Genet. A.* 137A, 328–331.
38. Aylward, E.H., Sparks, B.F., Field, K.M., Yallapragada, V., Shpritz, B.D., Rosenblatt, A., Brandt, J., Gourley, L.M., Liang, K., Zhou, H., et al. (2004). Onset and rate of striatal atrophy in preclinical Huntington disease. *Neurology* 63, 66–72.
39. Lanska, D.J., Lanska, M.J., Lavine, L., and Schoenberg, B.S. (1988). Conditions associated with Huntington's disease at death. A case-control study. *Arch. Neurol.* 45, 878–880.
40. Berent, S., Giordani, B., Lehtinen, S., Markel, D., Penney, J.B., Buchtel, H.A., Starosta-Rubinstein, S., Hichwa, R., and Young, A.B. (1988). Positron emission tomographic scan investigations of Huntington's disease: cerebral metabolic correlates of cognitive function. *Ann. Neurol.* 23, 541–546.
41. Young, A.B., Penney, J.B., Starosta-Rubinstein, S., Markel, D., Berent, S., Rothley, J., Betley, A., and Hichwa, R. (1987). Normal caudate glucose metabolism in persons at risk for Huntington's disease. *Arch. Neurol.* 44, 254–257.
42. Young, A.B., Penney, J.B., Starosta-Rubinstein, S., Markel, D.S., Berent, S., Giordani, B., Ehrenkaufer, R., Jewett, D., and Hichwa, R. (1986). PET scan investigations of Huntington's disease: cerebral metabolic correlates of neurological features and functional decline. *Ann. Neurol.* 20, 296–303.

The American Journal of Human Genetics

Supplemental Data

**The *HTT* CAG-Expansion Mutation Determines Age at Death  
but Not Disease Duration in Huntington Disease**

Jae Whan Keum, Aram Shin, Tammy Gillis, Jayalakshmi Srinidhi Mysore, Kawther Abu  
Elneel, Diane Lucente, Tiffany Hadzi, Peter Holmans, Lesley Jones, Michael Orth,  
Seung Kwak, Marcy E. MacDonald, James F. Gusella, and Jong-Min Lee

1 **Figure S1. Evaluation of normality of age at death data.**

2 Data normality was evaluated by comparing distribution of age at death for a given expanded CAG repeat  
3 length (histogram) to a theoretical normal distribution based on the mean and standard deviation of age at  
4 death (red line). The expanded CAG repeat length and sample size are indicated at the top of each plot.  
5 Histograms inside of the boundary in blue (CAG 40-52) resembled theoretical normal distributions.

6

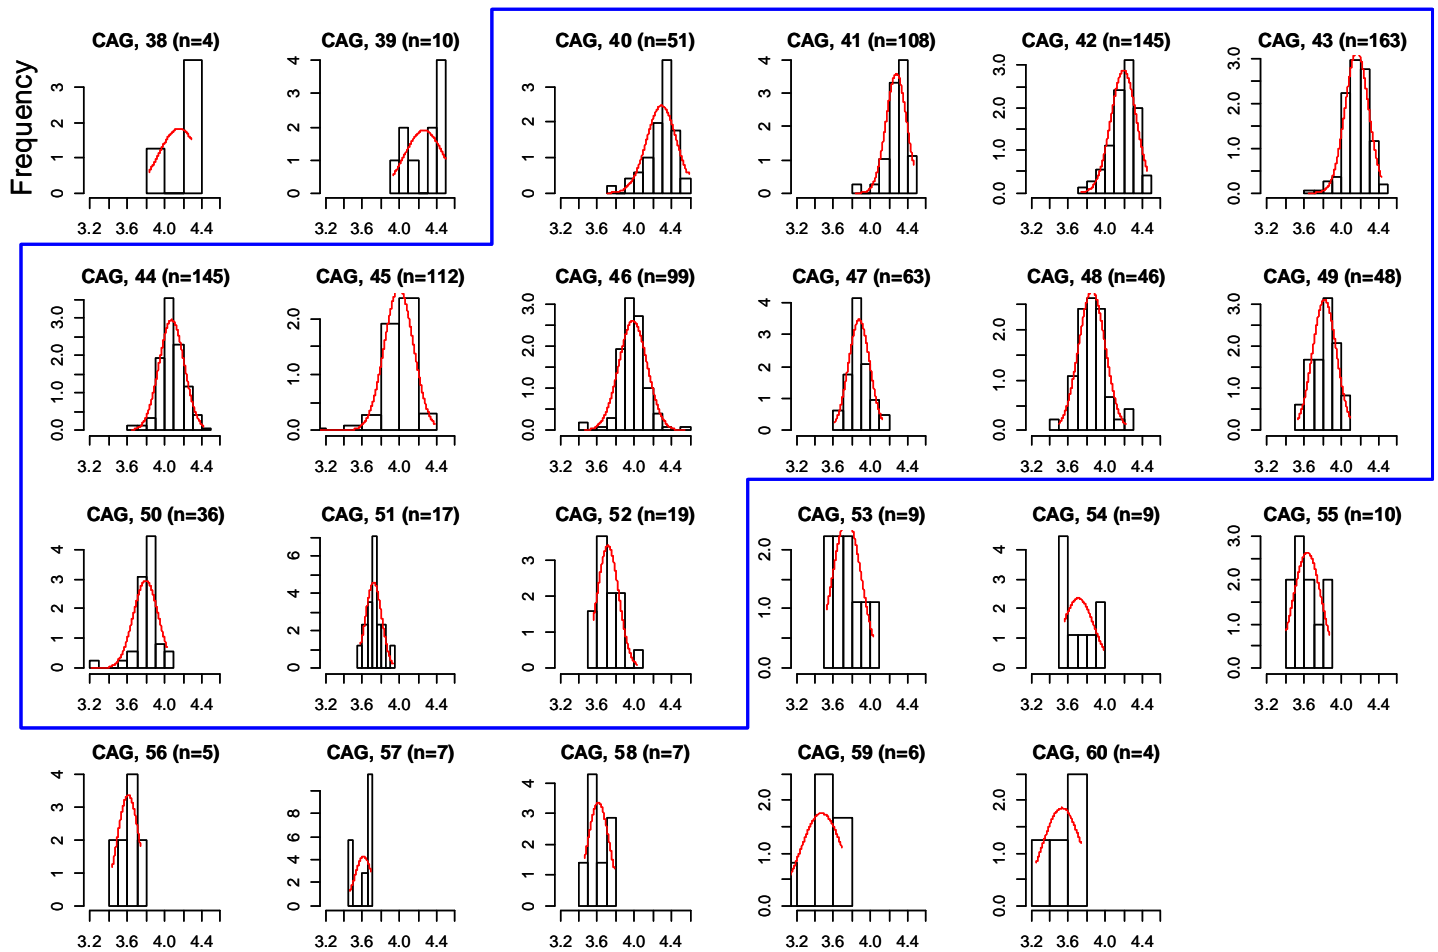

1 **Figure S2. Variance and outliers in age at death data.**

2 A) Variance of age at death was evaluated by plotting standard deviation of age at death against the expanded  
3 CAG repeat length. B) To resolve the non-constant variance problem in age at death data for subsequent  
4 parametric modeling, age at death was transformed into log scale (natural log), and standard deviation was re-  
5 calculated for each expanded CAG. C) Log transformed age at death was plotted against expanded CAG  
6 repeat on a box plot to identify phenotypic outliers. Outliers were identified by a standard interquartile method  
7 for each CAG repeat as described previously<sup>12</sup>, and indicated open circles.

8

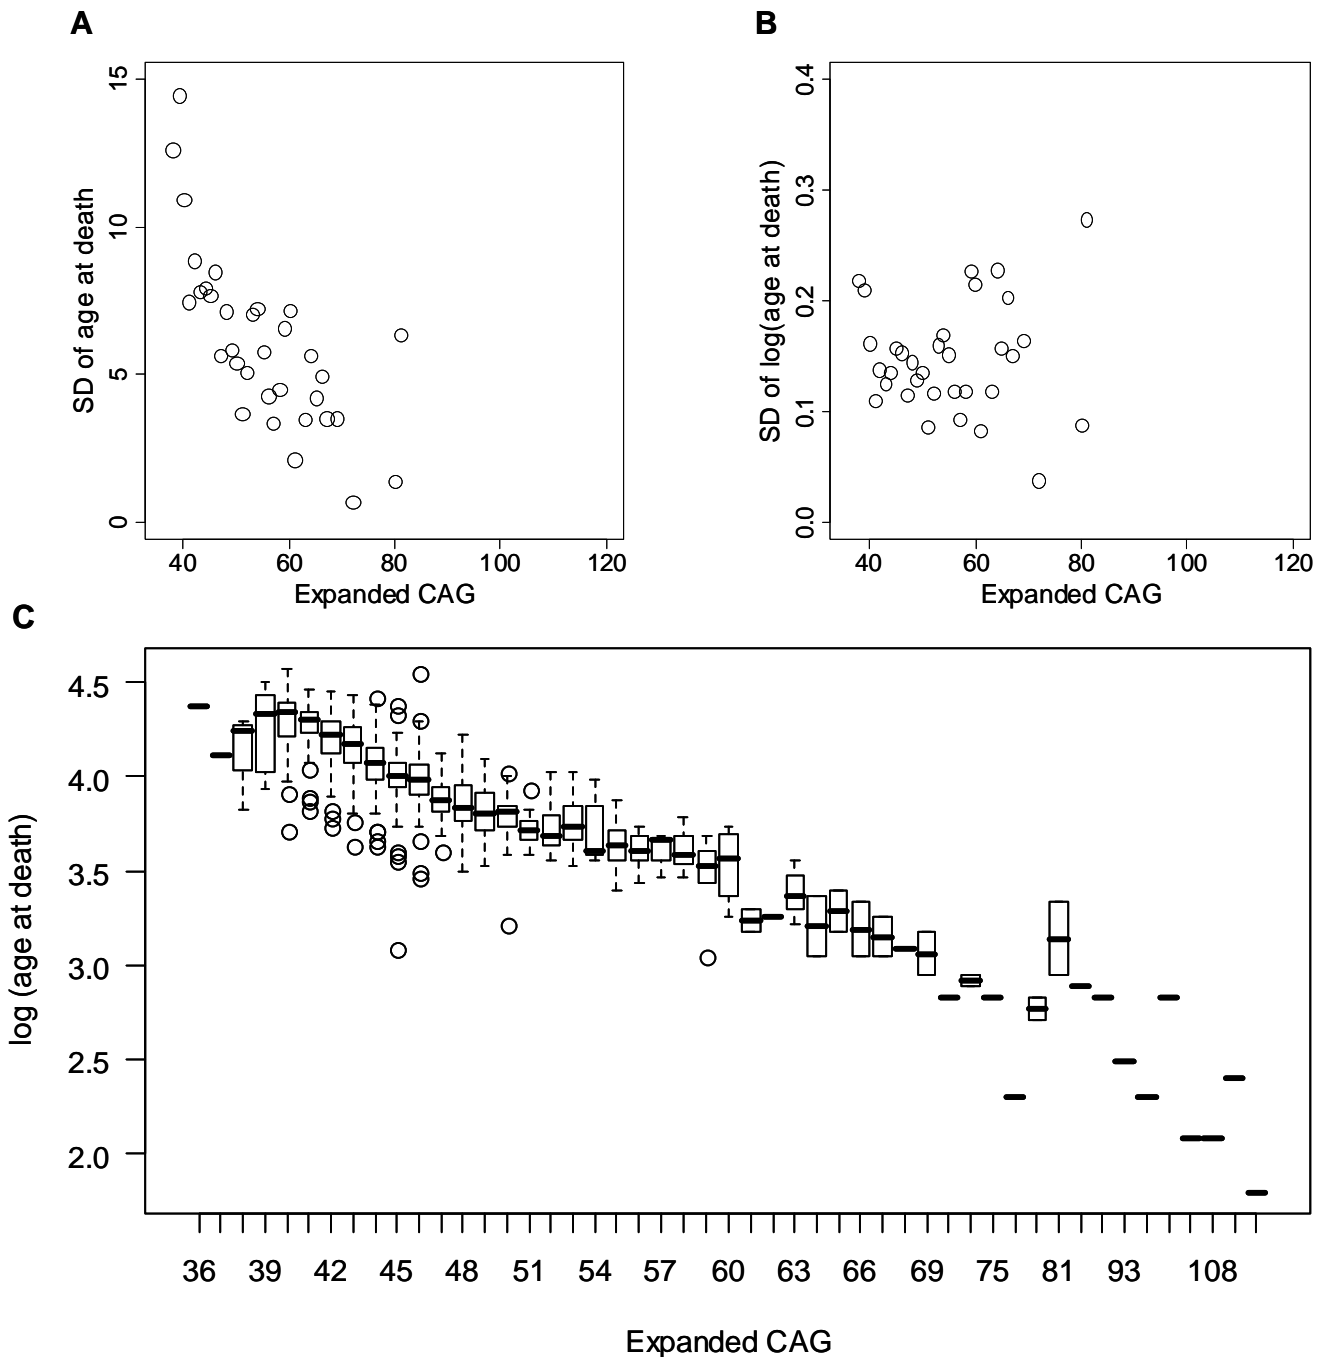

1 **Figure S3. Model diagnostic plots.**

2 For the QC dataset used to generate the Model 2 and a model using all samples (Model 3) in Table 1, we  
3 determined whether the requirements of linear models were met. Specifically, we checked variance (A and D),  
4 normality (B and E), and leverage (C and F). In a model using only QC-passed data, variance and normality  
5 were greatly improved compared to those of model using all data points (A vs. D; B vs. E), supporting its  
6 reliability. A and D) Residuals calculated from a model using normally distributed samples are compared to  
7 fitted values. B and E) Normality of the model using normally distributed samples was assessed by comparing  
8 actual residuals to theoretical residuals in a quantile-quantile plot. C and F) To identify influential data points in  
9 the model using normally distributed samples, standardized residuals were plotted against leverage and shown  
10 with the Cook's distance (red dotted contour lines). Leverage is commonly used to identify observations that  
11 have a disproportionate effect on the regression model, and a data point with high leverage indicates that that  
12 observation is distantly located from the center of the measurements. Cook's distance estimates the influence  
13 of data points on a model fit by measuring the effect of deleting a given observation. Red lines in plots  
14 represent LOWESS regression smoothed lines, based on locally-weighted polynomial regression models  
15 describing trends between values on the X-axis and Y-axis.

16

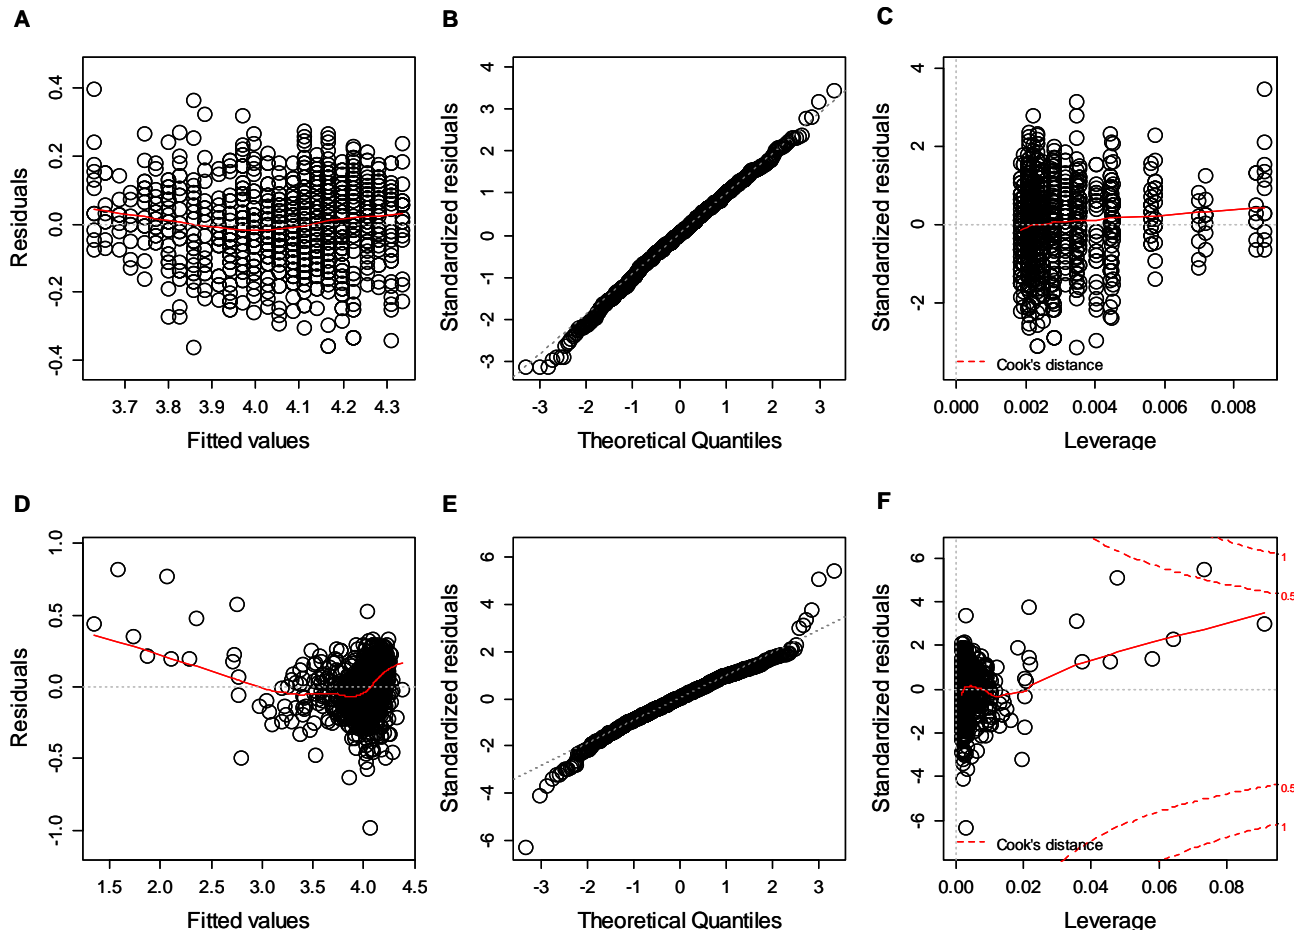



1 **Figure S4. Normal CAG repeat does not explain age at death.**

2 To test whether data points excluded as outliers show evidence of an influence of the normal CAG allele on  
3 age at death, residuals of all samples were calculated from the minimal adequate model described in Table 1  
4 (Model 2). Subsequently, residuals were modeled as a function of normal CAG repeat length. The red line  
5 represents the model with an adjusted R-squared value of 0.2648%, indicating that there is no significant  
6 relationship between normal CAG repeat length and age at death (p-value, 0.0521).

7

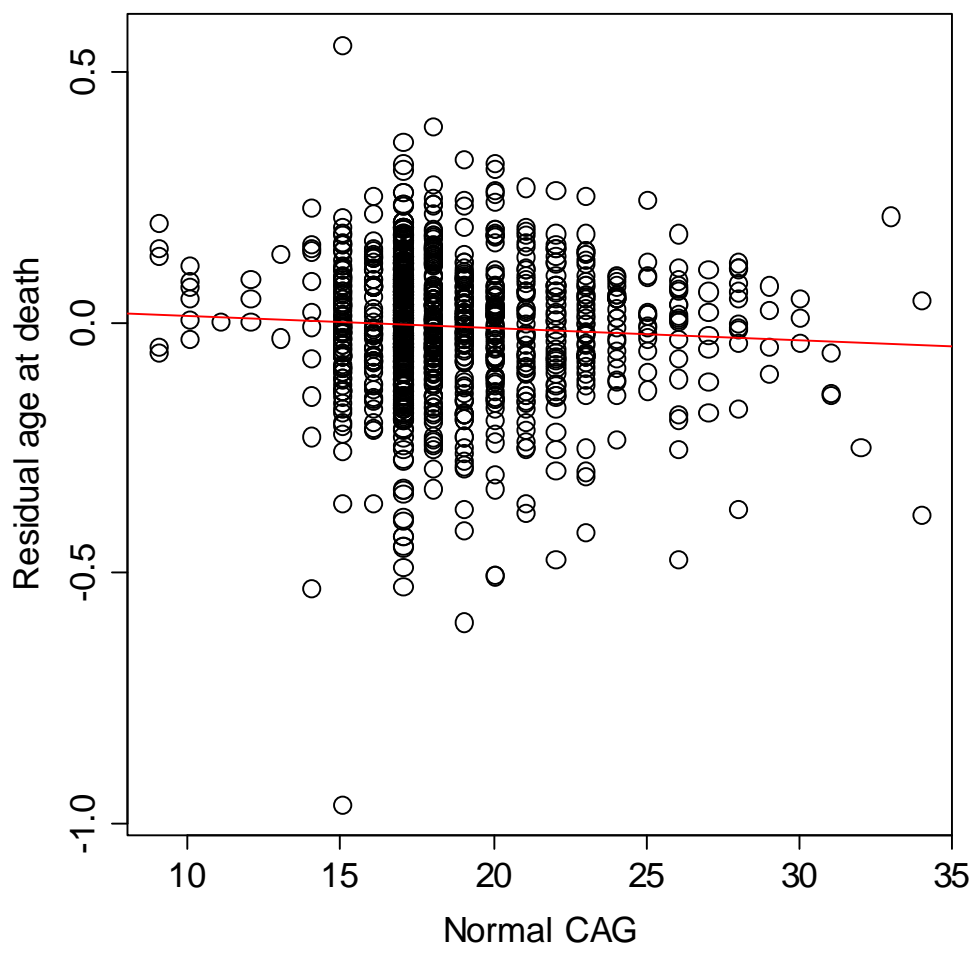

1 **Figure S5. Extreme age at death samples do not differ in normal CAG repeat lengths.**

2 To test whether the 10% extremes of residual of age at death based on the model described in Table 1 (Model  
3 2) had different normal CAG repeat lengths, 105 samples representing to top 10% and 105 samples  
4 representing the bottom 10% of residuals were identified.

5 A) Residual of age at death was plotted against expanded CAG repeat length and the 10% extremes shown as  
6 blue and red circles. B) Normal CAG repeat lengths (Y-axis) were compared between the 10% extremes from  
7 panel A, and did not differ (Mann-Whitney U test p-value, 0.06414)

8

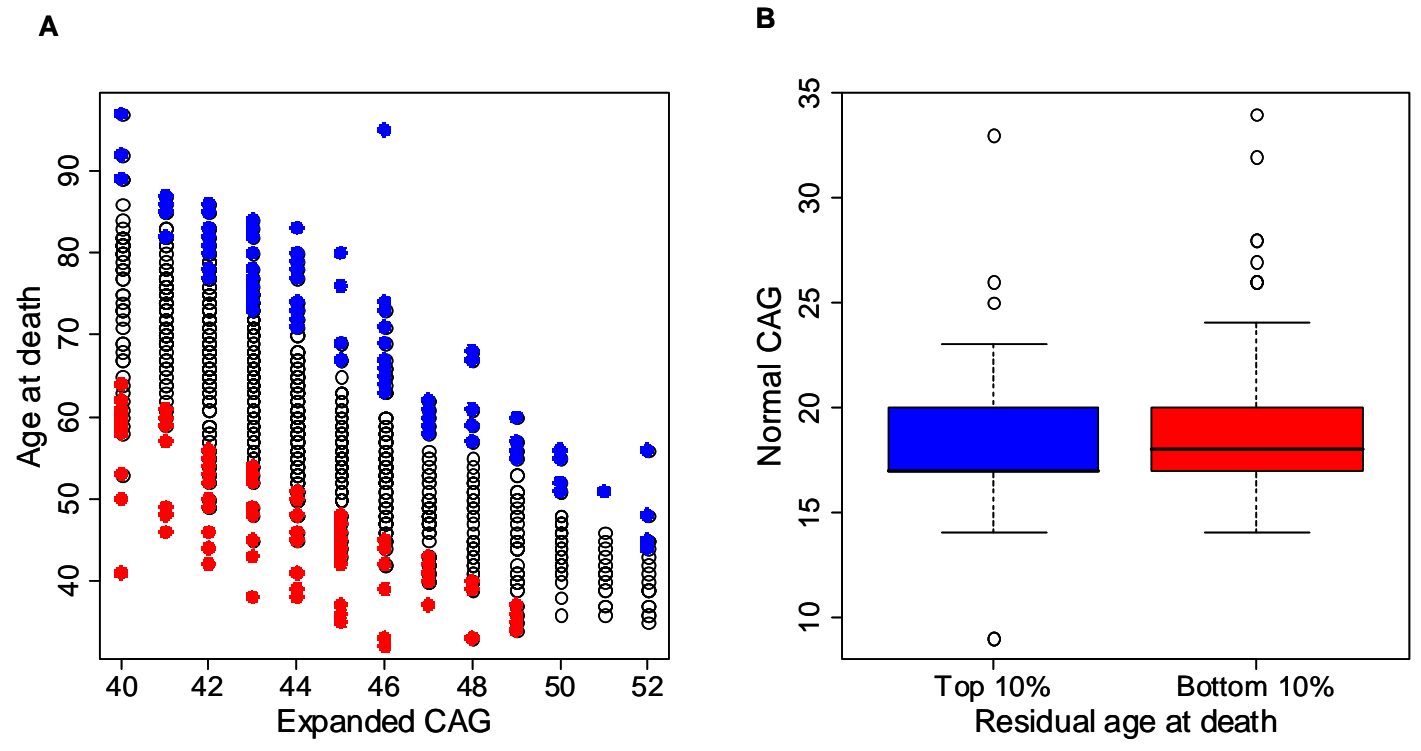

**Figure S6. Age at death is determined by expanded CAG repeat length in a fully dominant fashion in samples with expanded CAG > 52.**

To test whether normal CAG repeats had significant effects on age at death in HD subjects with expanded CAG repeats greater than 52 units, 97 such subjects were identified.

A) Log transformed age at death of HD subjects with expanded CAG repeats greater than 52 was plotted against expanded CAG repeat length. B) Log transformed age at death of the same subjects was plotted against normal CAG repeat. C) A multiple regression model to fit the data was generated. In this model, log transformed age at death of HD subjects with expanded CAG > 52 was modeled as a function of expanded CAG repeat, and normal CAG repeat.

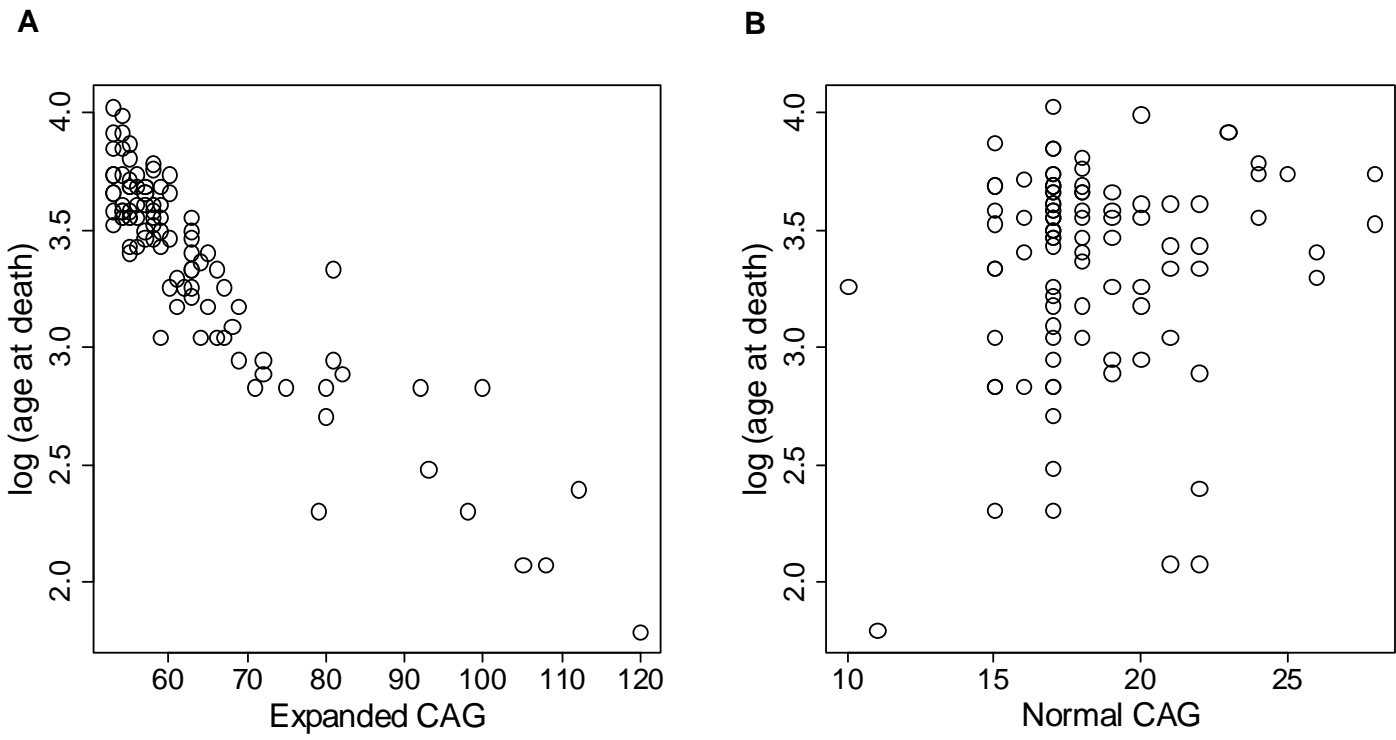

**C**

| Samples  | Sample size | Expanded CAG p-value | Normal CAG p-value | Adjusted R <sup>2</sup> |
|----------|-------------|----------------------|--------------------|-------------------------|
| CAG > 52 | 97          | <2e-16               | 0.941              | 81.65%                  |

1 **Figure S7. Non-normal distribution of duration.**

2 Relative frequencies (density on Y axis) of age at onset of motor signs (A; 4,161 samples), age at death (B;  
3 1,165 samples), and duration (C; 878 samples) for each CAG repeat were plotted in histograms. All data  
4 without quality control analysis were plotted. Red lines represent theoretical normal distributions based on the  
5 means and standard deviations of data.

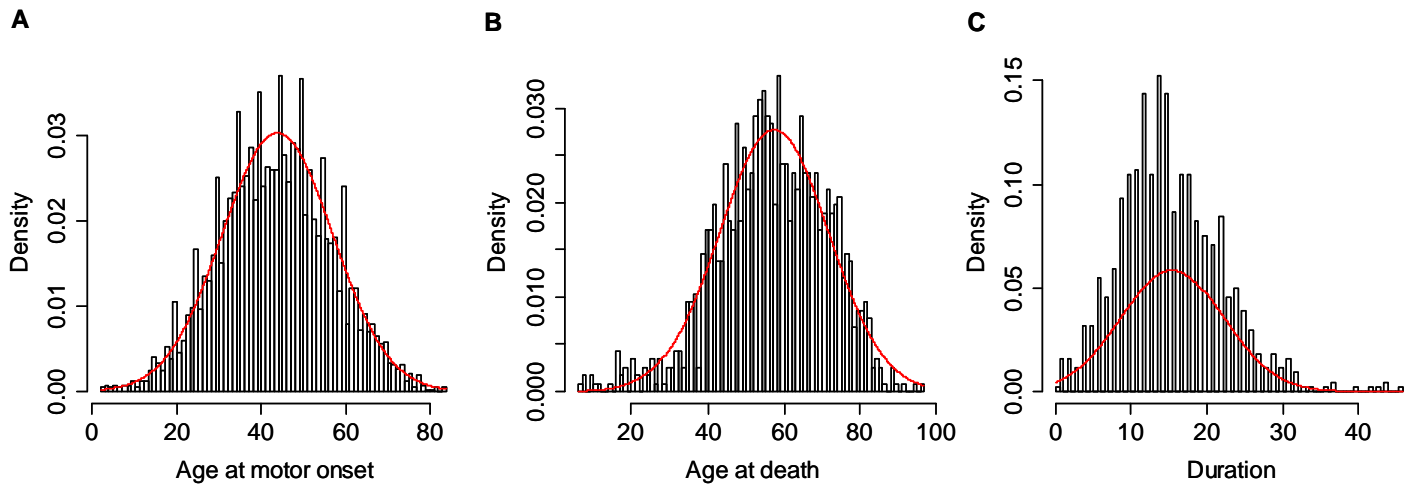

1 **Figure S8. Evaluation of normality of duraton data.**

2 Data normality for each CAG repeat was evaluated by comparing the observed distribution of duration values  
3 for a given expanded CAG repeat length to a theoretical normal distribution based on the mean and standard  
4 deviation of data (red line). The expanded CAG repeat length and sample size are indicated at the top of each  
5 plot.

6

7

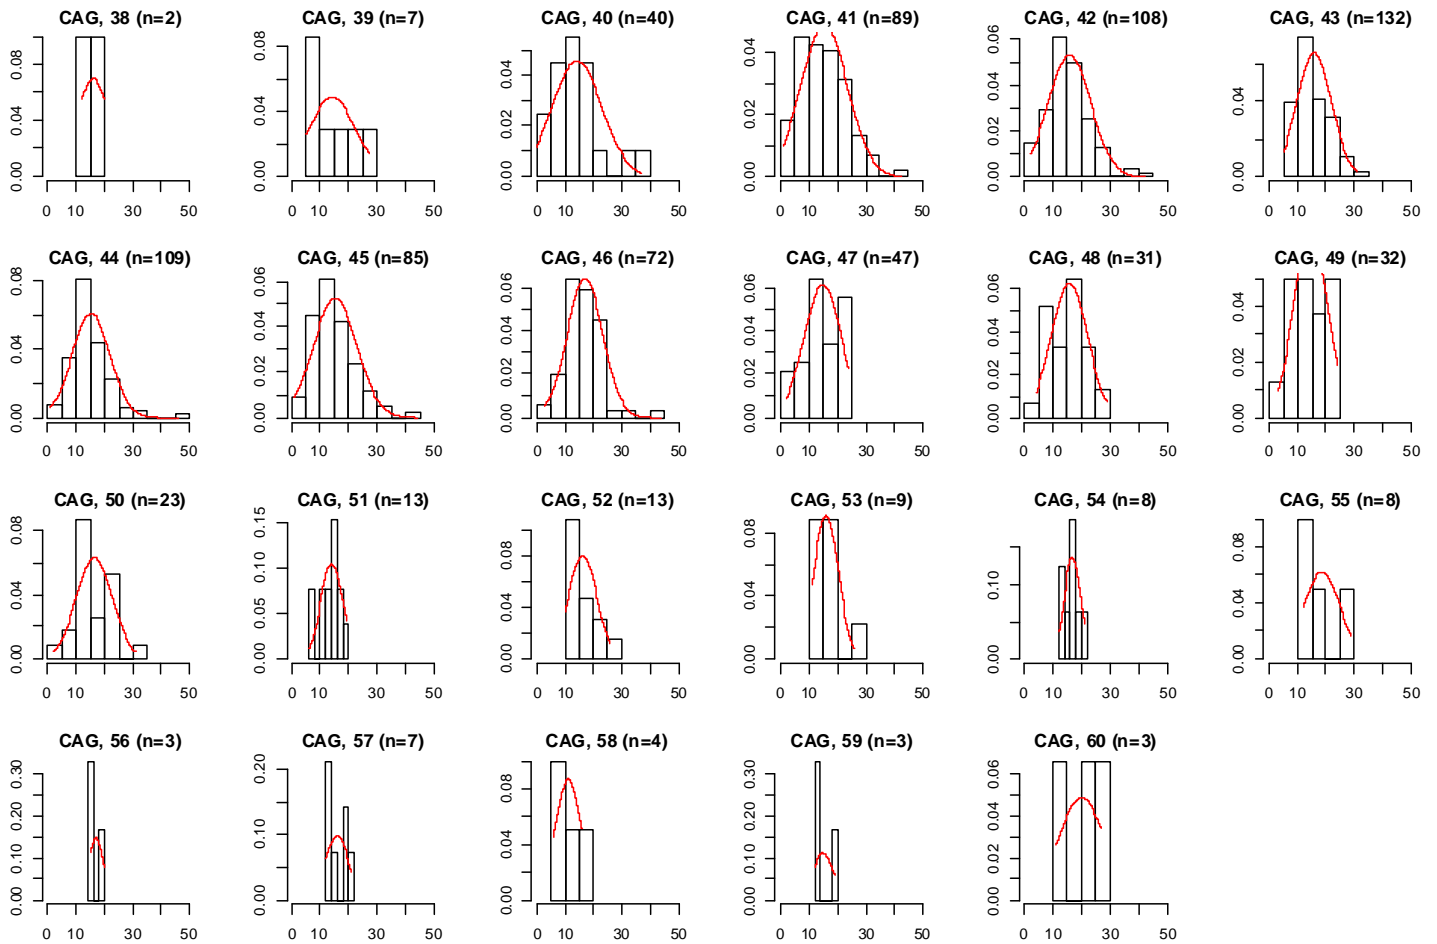

1 **Figure S9. HD disease duration is independent of *HTT* expanded CAG repeat length.**

2 A) To test whether HD subjects with smaller expanded CAG repeats had different duration values from those  
3 with larger expanded CAG repeats, disease duration was compared for 247 HD subjects with expanded CAG  
4 < 43 (blue circles) and 305 HD subjects with expanded CAG > 45 (red circles). B) Distributions of disease  
5 duration for the individuals in Panel A are summarized. A Mann-Whitney U test revealed no significant  
6 difference in disease duration between the two groups (p-value, 0.484). In addition, duration values between  
7 different CAG bins such as CAG < 44 vs. CAG > 44 or CAG < 42 vs. CAG > 46 were not significantly different  
8 (p-value, 0.96 and 0.77, respectively). C) To test whether expanded CAG repeat lengths of HD subjects in the  
9 top or bottom 10% extremes of disease duration differed, the 87 HD subjects in each group were identified.  
10 Blue and red bars represent HD subjects with the shortest and longest disease duration, respectively. D)  
11 Distributions of expanded CAG repeats in the individuals from Panel C are summarized. A Mann-Whitney U  
12 test revealed no significant difference in CAG repeat length between the two groups (p-value, 0.897).

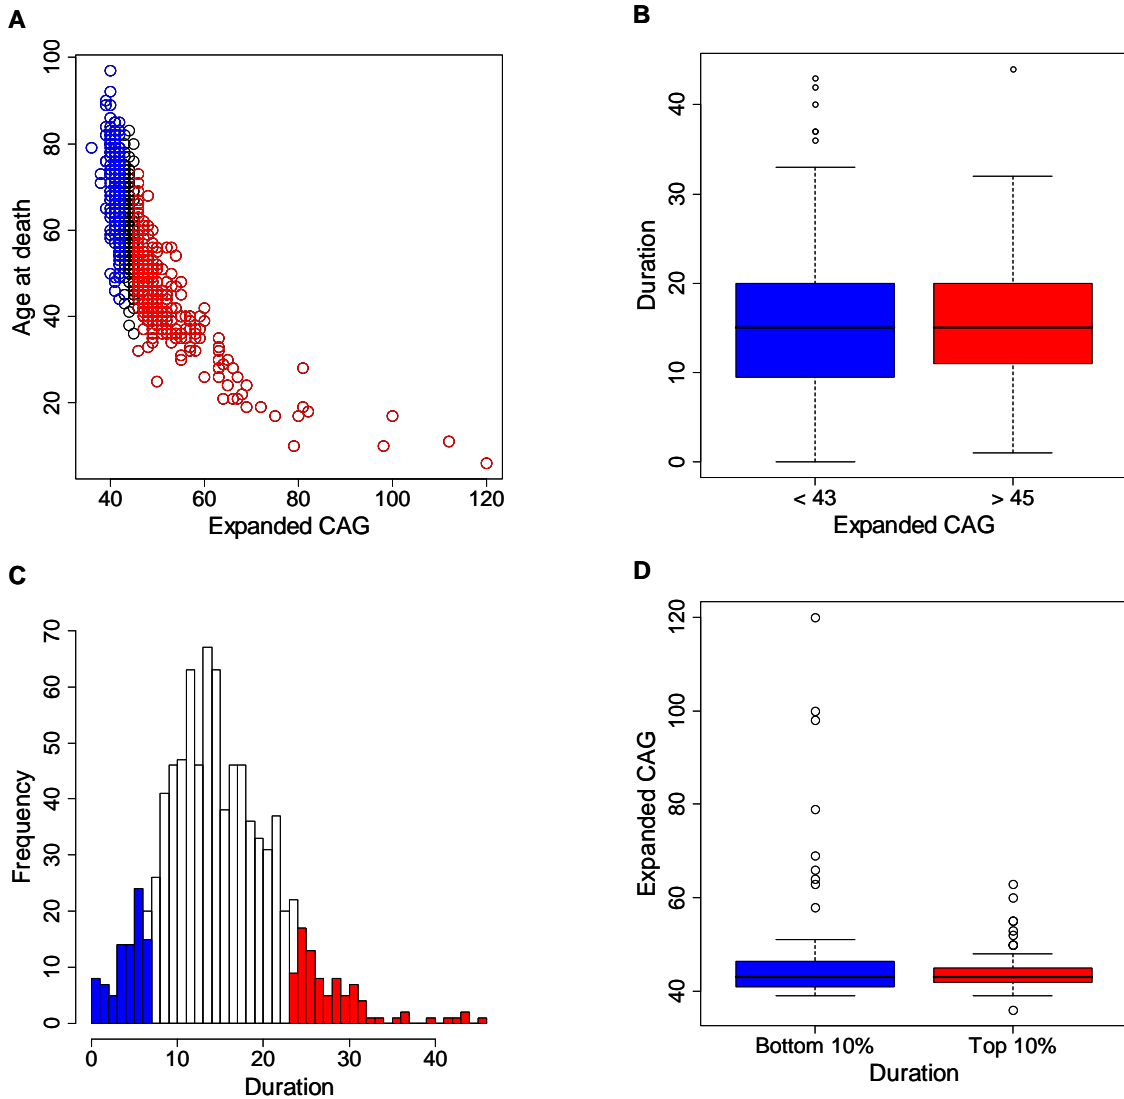

1 **Figure S10. Simulation analysis.**

2 Various statistical analyses consistently supported that CAG repeat length does not influence disease duration  
3 in typical adult onset HD subjects. Simulation analysis was performed in order to evaluate the pattern of  
4 relationship between CAG length and duration that would have been observed if CAG repeat length had a  
5 significant impact on duration. Duration values of 855 HD subjects (for more information refer to the legend of  
6 Figures S7) were randomly permuted to generate simulated data, in which the size of expanded CAG explains  
7 pre-specified amounts of variation in duration (B-F). A) Mean values of observed duration were plotted against  
8 CAG repeat sizes. Expanded CAG repeats explained 0.045% of variance of duration in observed data.  
9 Data permutation was performed until pre-specified regression model's R square value was achieved (B, 20%;  
10 C, 10%; D, 5%; E, 2%; F, 1%), and then the mean of permuted duration values for a given CAG length was  
11 plotted by CAG length. Representative plots are shown. Each open circle represent mean of duration values  
12 for a given CAG length.

13

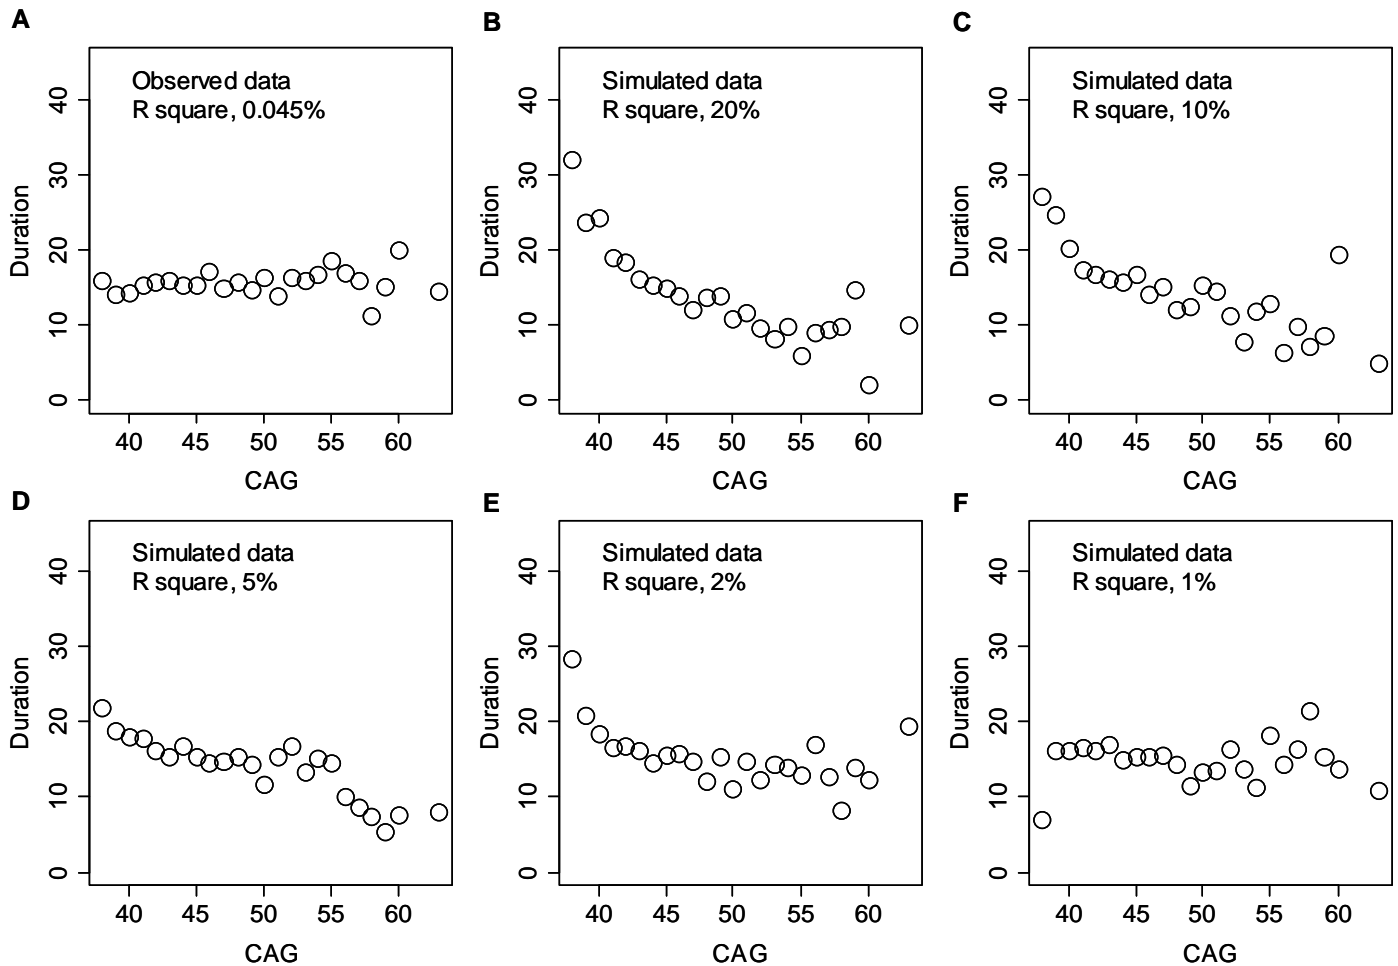

Supplement: mmc2.pdf [file mmc2.pdf]
